# Supplementary material for: One-step Barton decarboxylation by micellar catalysis – application to the synthesis of maleimide derivatives
Source: Royal Society of Chemistry journal article supplement (doi:10.1039/c5ra12583a), 2015-01-01

## Supporting Information

# One-step Barton decarboxylation by micellar catalysis – application to the synthesis of maleimide derivatives

Floriane Mangin,<sup>a</sup> Estelle Banaszak-Léonard<sup>a</sup> and Christophe Len<sup>a,b\*</sup>

<sup>a</sup>*Sorbonne Universités, Université de Technologie de Compiègne, Ecole Supérieure de Chimie Organique et Minérale, EA 4297 Transformations Intégrées de la Matière Renouvelable, Centre de Recherche Royallieu, CS 60319, F-60203 Compiègne cedex, France.*

*Fax: +33 (0)3 44 97 15 91; Tel: +33 (0)3 44 23 88 28;*

<sup>b</sup>*Department of Chemistry, University of Hull, Hull HU6 7RX, England.*

*E-mail: [christophe.len@utc.fr](mailto:christophe.len@utc.fr)*

## Table of Contents

|                                                  |          |
|--------------------------------------------------|----------|
| General information                              | S1       |
| General procedure for the Barton decarboxylation | S1       |
| General procedure for maleimide formation        | S1       |
| Spectral data of all compounds                   | S2 – S6  |
| NMR spectra of all compounds                     | S7 – S23 |

### General information

All products were purchased either from Acros or Sigma Aldrich depending on their availability and were used without further purification. All solvents were purchased from Carlo Erba. Reactions were performed with an ultrasonic probe (Bioblock Scientific, Vibra cell 75042) and monitored by TLC (Kieselgel 60F254 MERCK aluminium sheet) with detection by UV light and/or phosphomolybdic acid solution and by HPLC (Shimazu). Flash column chromatography was performed on an automatic Grace apparatus, using 40 g connected silica gel cartridges. <sup>1</sup>H and <sup>13</sup>C NMR spectra were recorded on a 400 MHz Bruker UltraShield 400 MHz/54 mm Ultra long hold. Chemical shifts ( $\delta$ ) are quoted in ppm and are referenced to TMS as an internal standard. Coupling constants ( $J$ ) are quoted in Hz. IR spectra were recorded on a Jasco FT/IR-4100 ATR.

### General procedure for the Barton decarboxylation

In a 100 mL Beaker containing a Brij<sup>®</sup>30 aqueous solution (300 mg in 30 mL), 2-mercaptopyridine-*N*-oxide (150 mg, 1.2 mmol), DCC (250 mg, 1.2 mmol), *N*-phenylmaleimide (268 mg, 1.5 mmol) and carboxylic acid (1.03 mmol) were introduced. The mixture was sonicated 20 min in an ice bath (the ultrasonic probe was placed at 1cm from the bottom of the beaker to ensure a homogenous dispersion). The crude mixture was lyophilized and the residue was purified on flash chromatography (Cyclohexane/EtOAc 1/0 to 7/3).

### General procedure for maleimide formation

In a 50 mL round bottom flask containing 1-phenylpyridin-2-ylthiopyrrolidine-2,5-dione (1 mmol) product in CH<sub>2</sub>Cl<sub>2</sub> (10 mL) was added *m*-CPBA (246 mg, 10 mmol) and the mixture is stirred for 10 min. at 0°C. Then saturated NaHCO<sub>3</sub> solution (30 mL) was added and the crude product extracted with CH<sub>2</sub>Cl<sub>2</sub> (30 mL). After the evaporation of the solvent, toluene (20 mL) was added and the media was heated under reflux for 1h. Toluene was evaporated and the crude mixture was purified on flash chromatography (Cyclohexane/EtOAc 1/0 to 7/3).

### 3-Pentyl-1-phenyl-4-(pyridin-2-ylthio)pyrrolidine-2,5-dione (1)

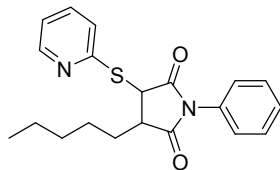

Following general procedure for Barton decarboxylation, white solid (218 mg, 60% yield).

mp: 77-79°C

$^1\text{H}$  NMR (400 MHz,  $\text{CDCl}_3$ )  $\delta$  ppm: 0.92 (t,  $J = 7.1$  Hz, 3H,  $\text{CH}_3$ ), 1.34-1.37 (m, 4H,  $\text{CH}_2$ ), 1.53-1.60 (m, 2H,  $\text{CH}_2$ ), 1.78-1.87 (m, 1H,  $\text{CH}_2$ ), 2.04-2.12 (m, 1H,  $\text{CH}_2$ ), 3.23 (dt,  $J = 8.6$  and 5.2 Hz, 1H,  $\text{CHCO}$ ), 3.92 (d,  $J = 5.6$  Hz, 1H,  $\text{CHS}$ ), 7.02 (ddd,  $J = 7.4$ , 5.0 and 1.0 Hz, 1H,  $\text{CH}\pi$ ), 7.22 (d,  $J = 8.1$  Hz, 1H,  $\text{CH}\pi$ ), 7.34-7.42 (m, 3H,  $\text{CH}_{\text{ar}}$ ), 7.46-7.55 (m, 3H,  $\text{CH}_{\text{ar}}$ ), 8.29 (ddd,  $J = 5.0$ , 1.8 and 1.0 Hz, 1H,  $\text{CH}\pi$ )

$^{13}\text{C}$  NMR (100 MHz,  $\text{CDCl}_3$ )  $\delta$  ppm: 14.0 ( $\text{CH}_3$ ), 22.4 ( $\text{CH}_2$ ), 26.1 ( $\text{CH}_2$ ), 30.7 ( $\text{CH}_2$ ), 31.6 ( $\text{CH}_2$ ), 46.9 (CH), 47.2 (CHS), 120.2 ( $\text{CH}\pi$ ), 122.1 ( $\text{CH}\pi$ ), 126.4 (2  $\text{CH}_{\text{Ph}}$ ), 128.5 ( $\text{CH}_{\text{Ph}}$ ), 129.1 (2  $\text{CH}_{\text{Ph}}$ ), 132.5 ( $\text{C}_{\text{Ph}}\text{N}$ ), 136.6 ( $\text{CH}\pi$ ), 149.0 ( $\text{CH}\pi\text{N}$ ), 156.1 ( $\text{C}\pi\text{S}$ ), 174.4 ( $\text{COCHS}$ ), 177.4 (CO)

$\nu_{\text{max}}/\text{cm}^{-1}$ : 1707 (C=O), 1389 (CH), 1173 (C-N),

HRMS (ESI): found 355.1480; calculated 355.1480 for  $\text{C}_{20}\text{H}_{23}\text{N}_2\text{O}_2\text{S}$

### 3-Hexyl-1-phenyl-4-(pyridin-2-ylthio)pyrrolidine-2,5-dione (2)

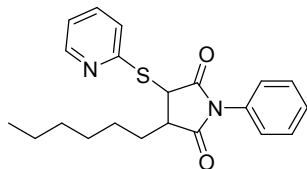

Following general procedure for Barton decarboxylation, colourless wax (235 mg, 62% yield).

$^1\text{H}$  NMR (400 MHz,  $\text{CDCl}_3$ )  $\delta$  ppm: 0.89 (t,  $J = 7.0$  Hz, 3H,  $\text{CH}_3$ ), 1.26-1.39 (m, 6H,  $\text{CH}_2$ ), 1.55 (quin,  $J = 7.5$  Hz, 2H,  $\text{CH}_2$ ), 1.77-1.87 (m, 1H,  $\text{CH}_2$ ), 2.04-2.13 (m, 1H,  $\text{CH}_2$ ), 3.24 (dt,  $J = 8.7$  and 5.3 Hz, 1H,  $\text{CHCO}$ ), 3.90 (d,  $J = 5.7$  Hz, 1H,  $\text{CHS}$ ), 7.01 (ddd,  $J = 7.4$ , 5.0 and 1.0 Hz, 1H,  $\text{CH}\pi$ ), 7.21 (d,  $J = 8.1$  Hz, 1H,  $\text{CH}\pi$ ), 7.34-7.42 (m, 3H,  $\text{CH}_{\text{ar}}$ ), 7.46-7.54 (m, 3H,  $\text{CH}_{\text{ar}}$ ), 8.29 (ddd,  $J = 4.9$ , 1.7 and 0.9 Hz, 1H,  $\text{CH}\pi$ )

$^{13}\text{C}$  NMR (100 MHz,  $\text{CDCl}_3$ )  $\delta$  ppm: 14.0 ( $\text{CH}_3$ ), 22.5 ( $\text{CH}_2$ ), 26.4 ( $\text{CH}_2$ ), 29.1 ( $\text{CH}_2$ ), 30.7 ( $\text{CH}_2$ ), 31.5 ( $\text{CH}_2$ ), 46.9 (CH), 47.2 (CHS), 120.2 ( $\text{CH}\pi$ ), 122.1 ( $\text{CH}\pi$ ), 126.4 (2  $\text{CH}_{\text{Ph}}$ ), 128.5 ( $\text{CH}_{\text{Ph}}$ ), 129.1 (2  $\text{CH}_{\text{Ph}}$ ), 132.5 ( $\text{C}_{\text{Ph}}\text{N}$ ), 136.6 ( $\text{CH}\pi$ ), 148.9 ( $\text{CH}\pi\text{N}$ ), 156.0 ( $\text{C}\pi\text{S}$ ), 174.4 ( $\text{COCHS}$ ), 177.3 (CO)

$\nu_{\text{max}}/\text{cm}^{-1}$ : 1715 (C=O), 1381 (CH), 1183 (C-N),

HRMS (ESI): found 369.1635; calculated 369.1632 for  $\text{C}_{21}\text{H}_{25}\text{N}_2\text{O}_2\text{S}$

### 3-Heptyl-1-phenyl-4-(pyridin-2-ylthio)pyrrolidine-2,5-dione (3)

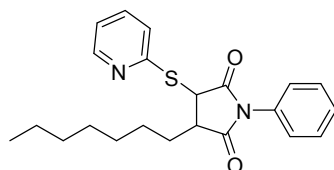

Following general procedure for Barton decarboxylation, colourless oil (228 mg, 58% yield).

$^1\text{H}$  NMR (400 MHz,  $\text{CDCl}_3$ )  $\delta$  ppm: 0.88 (t,  $J = 6.9$  Hz, 3H,  $\text{CH}_3$ ), 1.26-1.37 (m, 8H,  $\text{CH}_2$ ), 1.55 (quin,  $J = 7.5$  Hz, 2H,  $\text{CH}_2$ ), 1.77-1.87 (m, 1H,  $\text{CH}_2$ ), 2.04-2.12 (m, 1H,  $\text{CH}_2$ ), 3.23 (dt,  $J = 8.7$  and 5.2 Hz, 1H,  $\text{CHCO}$ ), 3.93 (d,  $J = 5.6$  Hz, 1H,  $\text{CHS}$ ), 7.02 (ddd,  $J = 7.4$ , 5.0 and 1.0 Hz, 1H,  $\text{CH}\pi$ ), 7.23 (d,  $J = 8.1$  Hz, 1H,  $\text{CH}\pi$ ), 7.33-7.41 (m, 3H,  $\text{CH}_{\text{ar}}$ ), 7.45-7.55 (m, 3H,  $\text{CH}_{\text{ar}}$ ), 8.29 (ddd,  $J = 5.0$ , 1.7 and 1.0 Hz, 1H,  $\text{CH}\pi$ )

$^{13}\text{C}$  NMR (100 MHz,  $\text{CDCl}_3$ )  $\delta$  ppm: 14.0 ( $\text{CH}_3$ ), 22.6 ( $\text{CH}_2$ ), 26.5 ( $\text{CH}_2$ ), 29.0 ( $\text{CH}_2$ ), 29.4 ( $\text{CH}_2$ ), 30.7 ( $\text{CH}_2$ ), 31.7 ( $\text{CH}_2$ ), 46.9 (CH), 47.1 (CHS), 120.3 ( $\text{CH}\pi$ ), 122.2 ( $\text{CH}\pi$ ), 126.4 (2  $\text{CH}_{\text{Ph}}$ ), 128.5 ( $\text{CH}_{\text{Ph}}$ ), 129.1 (2  $\text{CH}_{\text{Ph}}$ ), 132.5 ( $\text{C}_{\text{Ph}}\text{N}$ ), 136.7 ( $\text{CH}\pi$ ), 148.9 ( $\text{CH}\pi\text{N}$ ), 156.0 ( $\text{C}\pi\text{S}$ ), 174.4 ( $\text{COCHS}$ ), 177.3 (CO)

$\nu_{\text{max}}/\text{cm}^{-1}$ : 1715 (C=O), 1380 (CH), 1184 (C-N),

HRMS (ESI): found 383.1788; calculated 383.1793 for  $\text{C}_{22}\text{H}_{27}\text{N}_2\text{O}_2\text{S}$

### 3-Nonyl-1-phenyl-4-(pyridin-2-ylthio)pyrrolidine-2,5-dione (4)

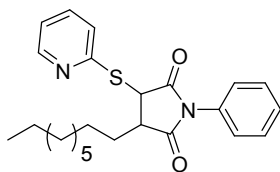

Following general procedure for Barton decarboxylation, white solid (235 mg, 54% yield).

mp: 56-57°C

$^1\text{H}$  NMR (400 MHz,  $\text{CDCl}_3$ )  $\delta$  ppm: 0.88 (t,  $J = 6.9$  Hz, 3H,  $\text{CH}_3$ ), 1.26-1.36 (m, 12H,  $\text{CH}_2$ ), 1.56 (quin,  $J = 7.4$  Hz, 2H,  $\text{CH}_2$ ), 1.78-1.87 (m, 1H,  $\text{CH}_2$ ), 2.04-2.12 (m, 1H,  $\text{CH}_2$ ), 3.23 (dt,  $J = 8.8$  and 5.1 Hz, 1H,  $\text{CHCO}$ ), 3.92 (d,  $J = 5.6$  Hz, 1H,  $\text{CHS}$ ), 7.02 (dd,  $J = 6.7$  and 5.0 Hz, 1H,  $\text{CH}\pi$ ), 7.23 (d,  $J = 8.1$  Hz, 1H,  $\text{CH}\pi$ ), 7.35-7.41 (m, 3H,  $\text{CH}_{\text{ar}}$ ), 7.46-7.55 (m, 3H,  $\text{CH}_{\text{ar}}$ ), 8.29 (d,  $J = 4.5$  Hz, 1H,  $\text{CH}\pi$ )

$^{13}\text{C}$  NMR (100 MHz,  $\text{CDCl}_3$ )  $\delta$  ppm: 14.1 ( $\text{CH}_3$ ), 22.6 ( $\text{CH}_2$ ), 26.5 ( $\text{CH}_2$ ), 29.2 ( $\text{CH}_2$ ), 29.3 ( $\text{CH}_2$ ), 29.4 ( $\text{CH}_2$ ), 29.5 ( $\text{CH}_2$ ), 30.8 ( $\text{CH}_2$ ), 31.8 ( $\text{CH}_2$ ), 46.9 (CH), 47.2 (CHS), 120.3 ( $\text{CH}\pi$ ), 122.2 ( $\text{CH}\pi$ ), 126.4 (2  $\text{CH}_{\text{Ph}}$ ), 128.5 ( $\text{CH}_{\text{Ph}}$ ), 129.1 (2  $\text{CH}_{\text{Ph}}$ ), 132.5 ( $\text{C}_{\text{Ph}}\text{N}$ ), 136.7 ( $\text{CH}\pi$ ), 149.0 ( $\text{CH}\pi\text{N}$ ), 156.0 ( $\text{C}\pi\text{S}$ ), 174.4 ( $\text{COCHS}$ ), 177.3 (CO)

$\nu_{\text{max}}/\text{cm}^{-1}$ : 1716 (C=O), 1386 (CH), 1180 (C-N),

HRMS (ESI): found 411.2102; calculated 411.2106 for  $\text{C}_{24}\text{H}_{31}\text{N}_2\text{O}_2\text{S}$

### 1-Phenyl-3-(pyridin-2-ylthio)-4-undecylpyrrolidine-2,5-dione (5)

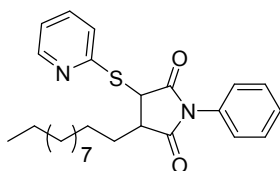

Following general procedure for Barton decarboxylation, white solid (258 mg, 57% yield).

mp: 62-65°C

$^1\text{H}$  NMR (400 MHz,  $\text{CDCl}_3$ )  $\delta$  ppm: 0.88 (t,  $J = 6.9$  Hz, 3H,  $\text{CH}_3$ ), 1.26 (bs, 16H,  $\text{CH}_2$ ), 1.55 (quin,  $J = 7.5$  Hz, 2H,  $\text{CH}_2$ ), 1.77-1.87 (m, 1H,  $\text{CH}_2$ ), 2.03-2.12 (m, 1H,  $\text{CH}_2$ ), 3.23 (dt,  $J = 8.7$  and 5.2 Hz, 1H,  $\text{CHCO}$ ), 3.92 (d,  $J = 5.7$  Hz, 1H,  $\text{CHS}$ ), 7.01 (ddd,  $J = 7.4$ , 5.0 and 1.0 Hz, 1H,  $\text{CH}\pi$ ), 7.22 (dt,  $J = 8.1$  and 0.9 Hz, 1H,  $\text{CH}\pi$ ), 7.34-7.41 (m, 3H,  $\text{CH}_{\text{ar}}$ ), 7.45-7.54 (m, 3H,  $\text{CH}_{\text{ar}}$ ), 8.28 (ddd,  $J = 5.0$ , 1.8 and 1.0 Hz, 1H,  $\text{CH}\pi$ )

$^{13}\text{C}$  NMR (100 MHz,  $\text{CDCl}_3$ )  $\delta$  ppm: 14.1 ( $\text{CH}_3$ ), 22.6 ( $\text{CH}_2$ ), 26.4 ( $\text{CH}_2$ ), 29.3 ( $\text{CH}_2$ ), 29.3 ( $\text{CH}_2$ ), 29.4 ( $\text{CH}_2$ ), 29.5 ( $\text{CH}_2$ ), 29.5 (2  $\text{CH}_2$ ), 30.7 ( $\text{CH}_2$ ), 31.8 ( $\text{CH}_2$ ), 46.9 (CH), 47.1 (CHS), 120.2 ( $\text{CH}\pi$ ), 122.1 ( $\text{CH}\pi$ ), 126.4 (2  $\text{CH}_{\text{Ph}}$ ), 128.4 ( $\text{CH}_{\text{Ph}}$ ), 129.0 (2  $\text{CH}_{\text{Ph}}$ ), 132.5 ( $\text{C}_{\text{Ph}}\text{N}$ ), 136.6 ( $\text{CH}\pi$ ), 148.9 ( $\text{CH}\pi\text{N}$ ), 156.0 ( $\text{C}\pi\text{S}$ ), 174.3 ( $\text{COCHS}$ ), 177.3 (CO)

$\nu_{\text{max}}/\text{cm}^{-1}$ : 1714 (C=O), 1388 (CH), 1182 (C-N),

HRMS (ESI): found 439.2418; calculated 439.2419 for  $\text{C}_{26}\text{H}_{35}\text{N}_2\text{O}_2\text{S}$

### 1-Phenyl-3-(pyridin-2-ylthio)-4-tetradecylpyrrolidine-2,5-dione (6)

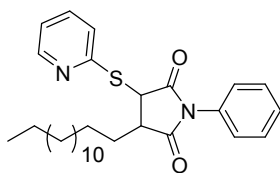

Following general procedure for Barton decarboxylation, white solid (301 mg, 61% yield).

mp: 72-74°C

$^1\text{H}$  NMR (400 MHz,  $\text{CDCl}_3$ )  $\delta$  ppm: 0.88 (t,  $J = 6.8$  Hz, 3H,  $\text{CH}_3$ ), 1.26 (bs, 22H,  $\text{CH}_2$ ), 1.55 (quin,  $J = 7.5$  Hz, 2H,  $\text{CH}_2$ ), 1.77-1.87 (m, 1H,  $\text{CH}_2$ ), 2.04-2.12 (m, 1H,  $\text{CH}_2$ ), 3.23 (dt,  $J = 8.7$  and 5.1 Hz, 1H,  $\text{CHCO}$ ), 3.91 (d,  $J = 5.6$  Hz, 1H,  $\text{CHS}$ ), 7.02 (dd,  $J = 6.7$  and 5.6 Hz, 1H,  $\text{CH}\pi$ ), 7.22 (d,  $J = 8.1$  Hz, 1H,  $\text{CH}\pi$ ), 7.35-7.41 (m, 3H,  $\text{CH}_{\text{ar}}$ ), 7.46-7.55 (m, 3H,  $\text{CH}_{\text{ar}}$ ), 8.29 (d,  $J = 4.9$  Hz, 1H,  $\text{CH}\pi$ )

$^{13}\text{C}$  NMR (100 MHz,  $\text{CDCl}_3$ )  $\delta$  ppm: 14.1 ( $\text{CH}_3$ ), 22.7 ( $\text{CH}_2$ ), 26.5 ( $\text{CH}_2$ ), 29.3 ( $\text{CH}_2$ ), 29.3 ( $\text{CH}_2$ ), 29.4 ( $\text{CH}_2$ ), 29.5 ( $\text{CH}_2$ ), 29.6 ( $\text{CH}_2$ ), 29.6 (2  $\text{CH}_2$ ), 29.7 ( $\text{CH}_2$ ), 29.7 ( $\text{CH}_2$ ), 30.8 ( $\text{CH}_2$ ), 31.9 ( $\text{CH}_2$ ), 46.9 (CH), 47.1 (CHS), 120.2 ( $\text{CH}\pi$ ), 122.1 ( $\text{CH}\pi$ ), 126.4 (2  $\text{CH}_{\text{Ph}}$ ), 128.4 ( $\text{CH}_{\text{Ph}}$ ), 129.1 (2  $\text{CH}_{\text{Ph}}$ ), 132.5 ( $\text{C}_{\text{Ph}}\text{N}$ ), 136.7 ( $\text{CH}\pi$ ), 148.9 ( $\text{CH}\pi\text{N}$ ), 156.0 ( $\text{C}\pi\text{S}$ ), 174.4 ( $\text{COCHS}$ ), 177.3 (CO)

$\nu_{\text{max}}/\text{cm}^{-1}$ : 1704 (C=O), 1391 (CH), 1174 (C-N),

HRMS (ESI): found 481.2891; calculated 481.2889 for  $\text{C}_{29}\text{H}_{41}\text{N}_2\text{O}_2\text{S}$

### 3-Pentadecyl-1-phenyl-4-(pyridin-2-ylthio)pyrrolidine-2,5-dione (7)

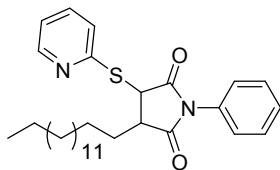

Following general procedure for Barton decarboxylation, white solid (336 mg, 66% yield).

mp: 68-71°C

$^1\text{H}$  NMR (400 MHz,  $\text{CDCl}_3$ )  $\delta$  ppm: 0.80 (t,  $J = 6.9$  Hz, 3H,  $\text{CH}_3$ ), 1.18-1.36 (m, 24H,  $\text{CH}_2$ ), 1.50 (quin,  $J = 7.4$  Hz, 2H,  $\text{CH}_2$ ), 1.70-1.77 (m, 1H,  $\text{CH}_2$ ), 2.96-2.03 (m, 1H,  $\text{CH}_2$ ), 3.13 (dt,  $J = 8.8$  and 5.1 Hz, 1H,  $\text{CHCO}$ ), 3.86 (d,  $J = 5.6$  Hz, 1H,  $\text{CHS}$ ), 6.95 (dd,  $J = 6.7$  and 5.0 Hz, 1H,  $\text{CH}\pi$ ), 7.17 (d,  $J = 8.1$  Hz, 1H,  $\text{CH}\pi$ ), 7.27-7.34 (m, 3H,  $\text{CH}_{ar}$ ), 7.39-7.49 (m, 3H,  $\text{CH}_{ar}$ ), 8.22 (d,  $J = 4.5$  Hz, 1H,  $\text{CH}\pi$ )

$^{13}\text{C}$  NMR (100 MHz,  $\text{CDCl}_3$ )  $\delta$  ppm: 14.1 ( $\text{CH}_3$ ), 22.7 ( $\text{CH}_2$ ), 26.5 ( $\text{CH}_2$ ), 29.4 ( $\text{CH}_2$ ), 29.4 ( $\text{CH}_2$ ), 29.5 ( $\text{CH}_2$ ), 29.6 ( $\text{CH}_2$ ), 29.6 ( $\text{CH}_2$ ), 29.7 ( $\text{CH}_2$ ), 30.7 ( $\text{CH}_2$ ), 31.9 ( $\text{CH}_2$ ), 46.9 (CH), 47.2 (CHS), 120.3 ( $\text{CH}\pi$ ), 122.2 ( $\text{CH}\pi$ ), 126.4 (2  $\text{CH}_{Ph}$ ), 128.5 ( $\text{CH}_{Ph}$ ), 129.1 (2  $\text{CH}_{Ph}$ ), 132.5 ( $\text{C}_{PhN}$ ), 136.8 ( $\text{CH}\pi$ ), 148.9 ( $\text{CH}\pi\text{N}$ ), 156.0 ( $\text{C}\pi\text{S}$ ), 174.4 (COCHS), 177.3 (CO)

$\nu_{\text{max}}/\text{cm}^{-1}$ : 1708 (C=O), 1387 (CH), 1173 (C-N),

HRMS (ESI): found 495.3047; calculated 495.3045 for  $\text{C}_{30}\text{H}_{43}\text{N}_2\text{O}_2\text{S}$

### 3-Heptadecyl-1-phenyl-4-(pyridin-2-ylthio)pyrrolidine-2,5-dione (8)

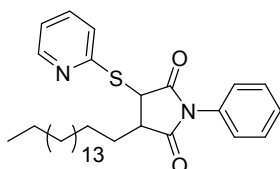

Following general procedure for Barton decarboxylation, white solid (296 mg, 55% yield).

mp: 85-86°C

$^1\text{H}$  NMR (400 MHz,  $\text{CDCl}_3$ )  $\delta$  ppm: 0.88 (t,  $J = 6.9$  Hz, 3H,  $\text{CH}_3$ ), 1.26 (bs, 28H,  $\text{CH}_2$ ), 1.56 (quin,  $J = 7.5$  Hz, 2H,  $\text{CH}_2$ ), 1.78-1.87 (m, 1H,  $\text{CH}_2$ ), 2.04-2.13 (m, 1H,  $\text{CH}_2$ ), 3.23 (dt,  $J = 8.7$  and 5.2 Hz, 1H,  $\text{CHCO}$ ), 3.95 (d,  $J = 5.6$  Hz, 1H,  $\text{CHS}$ ), 7.03 (ddd,  $J = 7.4$ , 5.0 and 1.0 Hz, 1H,  $\text{CH}\pi$ ), 7.24 (dt,  $J = 8.1$  and 0.9 Hz, 1H,  $\text{CH}\pi$ ), 7.34-7.42 (m, 3H,  $\text{CH}_{ar}$ ), 7.46-7.56 (m, 3H,  $\text{CH}_{ar}$ ), 8.30 (ddd,  $J = 5.0$ , 1.8 and 1.0 Hz, 1H,  $\text{CH}\pi$ )

$^{13}\text{C}$  NMR (100 MHz,  $\text{CDCl}_3$ )  $\delta$  ppm: 14.1 ( $\text{CH}_3$ ), 22.7 ( $\text{CH}_2$ ), 26.5 ( $\text{CH}_2$ ), 29.3 ( $\text{CH}_2$ ), 29.3 ( $\text{CH}_2$ ), 29.4 ( $\text{CH}_2$ ), 29.5 ( $\text{CH}_2$ ), 29.6 ( $\text{CH}_2$ ), 29.7 (2  $\text{CH}_2$ ), 29.7 (5  $\text{CH}_2$ ), 30.8 ( $\text{CH}_2$ ), 31.9 ( $\text{CH}_2$ ), 46.9 (CH), 47.2 (CHS), 120.3 ( $\text{CH}\pi$ ), 122.3 ( $\text{CH}\pi$ ), 126.4 (2  $\text{CH}_{Ph}$ ), 128.5 ( $\text{CH}_{Ph}$ ), 129.1 (2  $\text{CH}_{Ph}$ ), 132.5 ( $\text{C}_{PhN}$ ), 136.8 ( $\text{CH}\pi$ ), 148.9 ( $\text{CH}\pi\text{N}$ ), 156.0 ( $\text{C}\pi\text{S}$ ), 174.4 (COCHS), 177.3 (CO)

$\nu_{\text{max}}/\text{cm}^{-1}$ : 1708 (C=O), 1388 (CH), 1169 (C-N),

HRMS (ESI): found 523.3363; calculated 523.3359 for  $\text{C}_{32}\text{H}_{47}\text{N}_2\text{O}_2\text{S}$  and found 545.3198; calculated 545.3177 for  $\text{C}_{32}\text{H}_{46}\text{N}_2\text{O}_2\text{SNa}$

### (Z)-3-(Heptadec-8-en-1-yl)-1-phenyl-4-(pyridin-2-ylthio)pyrrolidine-2,5-dione (9)

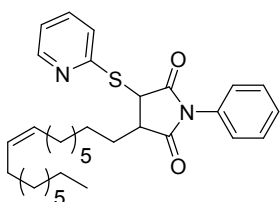

Following general procedure for Barton decarboxylation, colourless oil (321 mg, 60% yield).

$^1\text{H}$  NMR (400 MHz,  $\text{CDCl}_3$ )  $\delta$  ppm: 0.88 (t,  $J = 6.9$  Hz, 3H,  $\text{CH}_3$ ), 1.27-1.31 (m, 22H,  $\text{CH}_2$ ), 1.56 (quin,  $J = 7.4$  Hz, 2H,  $\text{CH}_2$ ), 1.77-1.87 (m, 1H,  $\text{CH}_2$ ), 2.01-2.05 (m, 1H,  $\text{CH}_2$ ), 3.23 (dt,  $J = 8.7$  and 5.2 Hz, 1H,  $\text{CHCO}$ ), 3.91 (d,  $J = 5.7$  Hz, 1H,  $\text{CHS}$ ), 5.35 (dt,  $J = 5.7$  and 3.5 Hz, 2H, CH), 7.01 (ddd,  $J = 7.4$ , 5.0 and 1.0 Hz, 1H,  $\text{CH}\pi$ ), 7.23 (dt,  $J = 8.1$  and 0.9 Hz, 1H,  $\text{CH}\pi$ ), 7.35-7.41 (m, 3H,  $\text{CH}_{ar}$ ), 7.46-7.55 (m, 3H,  $\text{CH}_{ar}$ ), 8.29 (ddd,  $J = 4.9$ , 1.8 and 0.9 Hz, 1H,  $\text{CH}\pi$ )

$^{13}\text{C}$  NMR (100 MHz,  $\text{CDCl}_3$ )  $\delta$  ppm: 14.1 ( $\text{CH}_3$ ), 22.7 ( $\text{CH}_2$ ), 26.5 ( $\text{CH}_2$ ), 27.1 ( $\text{CH}_2$ ), 27.2 ( $\text{CH}_2$ ), 29.1 ( $\text{CH}_2$ ), 29.2 ( $\text{CH}_2$ ), 29.3 (2  $\text{CH}_2$ ), 29.4 ( $\text{CH}_2$ ), 29.5 ( $\text{CH}_2$ ), 29.7 ( $\text{CH}_2$ ), 29.7 ( $\text{CH}_2$ ), 30.7 ( $\text{CH}_2$ ), 31.9 ( $\text{CH}_2$ ), 46.9 (CH), 47.1 (CHS), 120.2 ( $\text{CH}\pi$ ), 122.1 ( $\text{CH}\pi$ ), 126.4 (2  $\text{CH}_{Ph}$ ), 128.4 ( $\text{CH}_{Ph}$ ), 129.1 (2  $\text{CH}_{Ph}$ ), 129.7 (CH), 130.0 (CH), 132.5 ( $\text{C}_{PhN}$ ), 136.6 ( $\text{CH}\pi$ ), 149.0 ( $\text{CH}\pi\text{N}$ ), 156.0 ( $\text{C}\pi\text{S}$ ), 174.3 (COCHS), 177.3 (CO)

$\nu_{\text{max}}/\text{cm}^{-1}$ : 1717 (C=O), 1384 (CH), 1179 (C-N),

HRMS (ESI): found 521.3221; calculated 521.3202 for  $\text{C}_{32}\text{H}_{45}\text{N}_2\text{O}_2\text{S}$

### 3-((8Z,11Z)-Heptadeca-8,11-dien-1-yl)-1-phenyl-4-(pyridin-2-ylthio)pyrrolidine-2,5-dione (10)

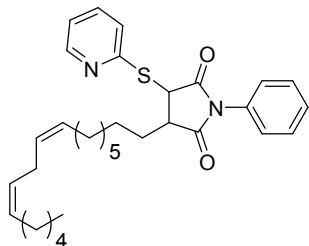

Following general procedure for Barton decarboxylation, colourless oil (327 mg, 61% yield).

$^1\text{H}$  NMR (400 MHz,  $\text{CDCl}_3$ )  $\delta$  ppm: 0.89 (t,  $J = 7.0$  Hz, 3H,  $\text{CH}_3$ ), 1.29-1.37 (m, 14H,  $\text{CH}_2$ ), 1.55 (quin,  $J = 7.2$  Hz, 2H,  $\text{CH}_2$ ), 1.76-1.86 (m, 1H,  $\text{CH}_2$ ), 2.06 (q,  $J = 6.8$  Hz, 5H,  $\text{CH}_2$ ), 2.78 (t,  $J = 6.3$  Hz, 2H,  $\text{CH}_2$ ), 3.23 (dt,  $J = 8.7$  and 5.2 Hz, 1H,  $\text{CHCO}$ ), 3.89 (d,  $J = 5.7$  Hz, 1H,  $\text{CHS}$ ), 5.30-5.43 (m, 4H, CH), 6.98 (ddd,  $J = 7.3$ , 5.0 and 0.8 Hz, 1H,  $\text{CH}\pi$ ), 7.19 (d,  $J = 8.1$  Hz, 1H,  $\text{CH}\pi$ ), 7.34-7.40 (m, 3H,  $\text{CH}_{\text{ar}}$ ), 7.44-7.52 (m, 3H,  $\text{CH}_{\text{ar}}$ ), 8.27 (ddd,  $J = 4.9$ , 1.7 and 1.0 Hz, 1H,  $\text{CH}\pi$ )

$^{13}\text{C}$  NMR (100 MHz,  $\text{CDCl}_3$ )  $\delta$  ppm: 14.0 ( $\text{CH}_3$ ), 22.4 ( $\text{CH}_2$ ), 25.5 ( $\text{CH}_2$ ), 26.4 ( $\text{CH}_2$ ), 27.1 (2  $\text{CH}_2$ ), 29.0 ( $\text{CH}_2$ ), 29.1 ( $\text{CH}_2$ ), 29.2 ( $\text{CH}_2$ ), 29.3 ( $\text{CH}_2$ ), 29.5 ( $\text{CH}_2$ ), 30.6 ( $\text{CH}_2$ ), 31.4 ( $\text{CH}_2$ ), 46.8 (CH), 47.0 (CHS), 120.1 ( $\text{CH}\pi$ ), 121.9 ( $\text{CH}\pi$ ), 126.3 (2  $\text{CH}_{\text{Ph}}$ ), 127.8 (CH), 127.9 (CH), 128.3 ( $\text{CH}_{\text{Ph}}$ ), 128.9 (2  $\text{CH}_{\text{Ph}}$ ), 129.9 (CH), 130.1 (CH), 132.5 ( $\text{C}_{\text{Ph}}\text{N}$ ), 136.5 ( $\text{CH}\pi$ ), 148.9 ( $\text{CH}\pi\text{N}$ ), 155.9 ( $\text{C}\pi\text{S}$ ), 174.2 ( $\text{COCHS}$ ), 177.2 (CO)

$\nu_{\text{max}}/\text{cm}^{-1}$ : 1717 (C=O), 1382 (CH), 1179 (C-N),

HRMS (ESI): found 519.3052; calculated 519.3046 for  $\text{C}_{32}\text{H}_{43}\text{N}_2\text{O}_2\text{S}$

### 3-Pentyl-1-phenyl-1H-pyrrole-2,5-dione (11)

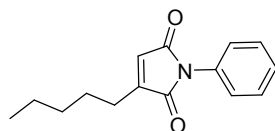

Following general procedure for maleimide formation, white solid, (242 mg, quantitative yield).

mp: 72-73°C

$^1\text{H}$  NMR (400 MHz,  $\text{CDCl}_3$ )  $\delta$  ppm: 0.93 (t,  $J = 7.1$  Hz, 3H,  $\text{CH}_3$ ), 1.33-1.42 (m, 4H,  $\text{CH}_2$ ), 1.63-1.70 (m, 2H,  $\text{CH}_2$ ), 2.52 (dt,  $J = 7.7$  and 1.7 Hz, 2H,  $\text{CH}_2$ ), 6.43 (t,  $J = 1.2$  Hz, 1H, CH), 7.33-7.36 (m, 3H,  $\text{CH}_{\text{ar}}$ ), 7.43-7.48 (m, 2H,  $\text{CH}_{\text{ar}}$ )

$^{13}\text{C}$  NMR (100 MHz,  $\text{CDCl}_3$ )  $\delta$  ppm: 13.9 ( $\text{CH}_3$ ), 22.3 ( $\text{CH}_2$ ), 25.5 ( $\text{CH}_2$ ), 26.8 ( $\text{CH}_2$ ), 31.3 ( $\text{CH}_2$ ), 125.9 (2  $\text{CH}_{\text{Ph}}$ ), 126.3 (CHCO), 127.6 ( $\text{CH}_{\text{Ph}}$ ), 129.0 (2  $\text{CH}_{\text{Ph}}$ ), 131.6 ( $\text{C}_{\text{Ph}}\text{N}$ ), 150.4 (COCCH<sub>2</sub>), 169.7 (CO), 170.4 (COCCH<sub>2</sub>)

$\nu_{\text{max}}/\text{cm}^{-1}$ : 1707 (C=O), 1388 (CH), 1179 (C-N)

HRMS (ESI): found 244.1340, calculated 244.1338 for  $\text{C}_{15}\text{H}_{18}\text{NO}_2$

### 3,4-Dipentyl-1-phenyl-3-(pyridin-2-ylthio)pyrrolidine-2,5-dione ((±)12a and (±)12b)

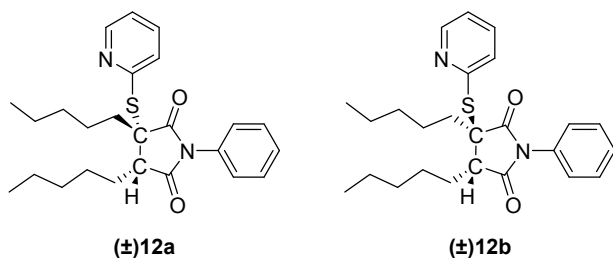

In a 100 mL Beaker containing a Brij®30 aqueous solution (300 mg in 30 mL), 2-mercaptopyridine-*N*-oxide (225 mg, 1.8 mmol), DCC (375 mg, 1.8 mmol), 11 (243 mg, 1 mmol) and caproic acid (174 mg, 1.5 mmol) were introduced. The mixture was sonicated 20 min in an ice bath (the ultrasonic probe was placed at 1cm from the bottom of the beaker to ensure a homogenous dispersion). The crude mixture was lyophilized and the residue was purified on flash chromatography (Cyclohexane/EtOAc 1/0 to 7/3).

Pale yellow oil (200 mg, 47% yield).

$^1\text{H}$  NMR (400 MHz,  $\text{CDCl}_3$ )  $\delta$  ppm: 0.85-0.93 (m, 6H,  $\text{CH}_3$ ), 1.27-1.38 (m, 9H,  $\text{CH}_2$ ), 1.56-1.77 (m, 4H,  $\text{CH}_2$ ), 1.82-2.16 (m, 3H,  $\text{CH}_2$ ), 2.96 (dd,  $J = 7.1$  and  $5.7$  Hz, 0.6H, CH), 3.65 (t,  $J = 6.8$  Hz, 0.4H, CH), 6.99 (ddd,  $J = 7.4$ , 6.2, and 5.0 Hz, 1H,  $\text{CH}_\pi$ ), 7.17-7.22 (m, 1H,  $\text{CH}_\pi$ ), 7.26-7.29 (m, 1H,  $\text{CH}_\pi$ ), 7.32-7.52 (m, 5H,  $\text{CH}_{\text{Ph}}$ ), 8.19 (ddd,  $J = 5.0$ , 1.8 and 0.9 Hz, 0.6H,  $\text{CH}_\pi$ ), 8.30 (ddd,  $J = 5.0$ , 1.8 and 0.9 Hz, 0.4H,  $\text{CH}_\pi$ )

$^{13}\text{C}$  NMR (100 MHz,  $\text{CDCl}_3$ )  $\delta$  ppm: 13.9 ( $\text{CH}_3$ ), 14.0 ( $\text{CH}_3$ ), 22.2 ( $\text{CH}_2$ ), 22.3 ( $\text{CH}_2$ ), 22.3 ( $\text{CH}_2$ ), 22.3 ( $\text{CH}_2$ ), 24.0 ( $\text{CH}_2$ ), 24.3 ( $\text{CH}_2$ ), 28.0 ( $\text{CH}_2$ ), 28.1 ( $\text{CH}_2$ ), 28.7 ( $\text{CH}_2$ ), 31.7 (2  $\text{CH}_2$ ), 31.7 ( $\text{CH}_2$ ), 31.8 ( $\text{CH}_2$ ), 33.9 ( $\text{CH}_2\text{CH}$ ), 38.4 ( $\text{CH}_2\text{CS}$ ), 47.8 ( $\text{CHCO}$ ), 48.1 ( $\text{CHCO}$ ), 56.9 ( $\text{CSCO}$ ), 59.0 ( $\text{CSCO}$ ), 120.0 ( $\text{CH}_\pi$ ), 120.2 ( $\text{CH}_\pi$ ), 122.0 ( $\text{CH}_\pi$ ), 122.1 ( $\text{CH}_\pi$ ), 126.3 (2  $\text{CH}_{\text{Ph}}$ ), 126.4 (2  $\text{CH}_{\text{Ph}}$ ), 128.1 ( $\text{CH}_{\text{Ph}}$ ), 128.3 ( $\text{CH}_{\text{Ph}}$ ), 128.9 (2  $\text{CH}_{\text{Ph}}$ ), 129.0 (2  $\text{CH}_{\text{Ph}}$ ), 132.6 ( $\text{C}_{\text{PhN}}$ ), 136.4 ( $\text{CH}_\pi$ ), 136.4 ( $\text{CH}_\pi$ ), 148.7 ( $\text{CH}_\pi\text{N}$ ), 148.9 ( $\text{CH}_\pi\text{N}$ ), 156.9 ( $\text{C}_\pi\text{S}$ ), 157.4 ( $\text{C}_\pi\text{S}$ ), 176.2 ( $\text{COCS}$ ), 176.9 ( $\text{COCS}$ ), 177.1 ( $\text{COCH}$ ), 177.5 ( $\text{COCH}$ )

$\nu_{\text{max}}/\text{cm}^{-1}$ : 1714 (C=O), 1387 (CH), 1182 (C-N),

HRMS (ESI): found 447.2086, calculated 447.2082 for  $\text{C}_{25}\text{H}_{32}\text{N}_2\text{O}_2\text{SNa}$

### 3,4-Dipentyl-1-phenyl-1*H*-pyrrole-2,5-dione (13)

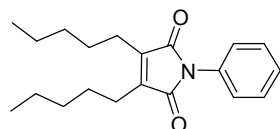

Following general procedure for maleimide formation, pale yellow oil (310 mg, quantitative yield).

$^1\text{H}$  NMR (400 MHz,  $\text{CDCl}_3$ )  $\delta$  ppm: 0.92 (t,  $J = 7.1$  Hz, 6H,  $\text{CH}_3$ ), 1.34-1.39 (m, 8H,  $\text{CH}_2$ ), 1.58-1.61 (m, 4H,  $\text{CH}_2$ ), 2.46 (t,  $J = 7.7$  Hz, 4H,  $\text{CH}_2$ ), 7.31-7.38 (m, 3H,  $\text{CH}_{\text{ar}}$ ), 7.42-7.46 (m, 2H,  $\text{CH}_{\text{ar}}$ )

$^{13}\text{C}$  NMR (100 MHz,  $\text{CDCl}_3$ )  $\delta$  ppm: 13.9 ( $\text{CH}_3$ ), 22.4 ( $\text{CH}_2$ ), 23.8 ( $\text{CH}_2$ ), 28.3 ( $\text{CH}_2$ ), 31.8 ( $\text{CH}_2$ ), 125.7 (2  $\text{CH}_{\text{Ph}}$ ), 127.2 ( $\text{CH}_{\text{Ph}}$ ), 129.0 (2  $\text{CH}_{\text{Ph}}$ ), 132.0 ( $\text{C}_{\text{PhN}}$ ), 141.2 (C=C), 170.8 (CO)

$\nu_{\text{max}}/\text{cm}^{-1}$ : 1709 (C=O), 1305 (CH), 1198 (C-N)

HRMS (ESI): found 314.2120, calculated 314.2106 for  $\text{C}_{20}\text{H}_{28}\text{NO}_2$

3-pentyl-1-phenyl-4-(pyridin-2-ylthio)pyrrolidine-2,5-dione (1)

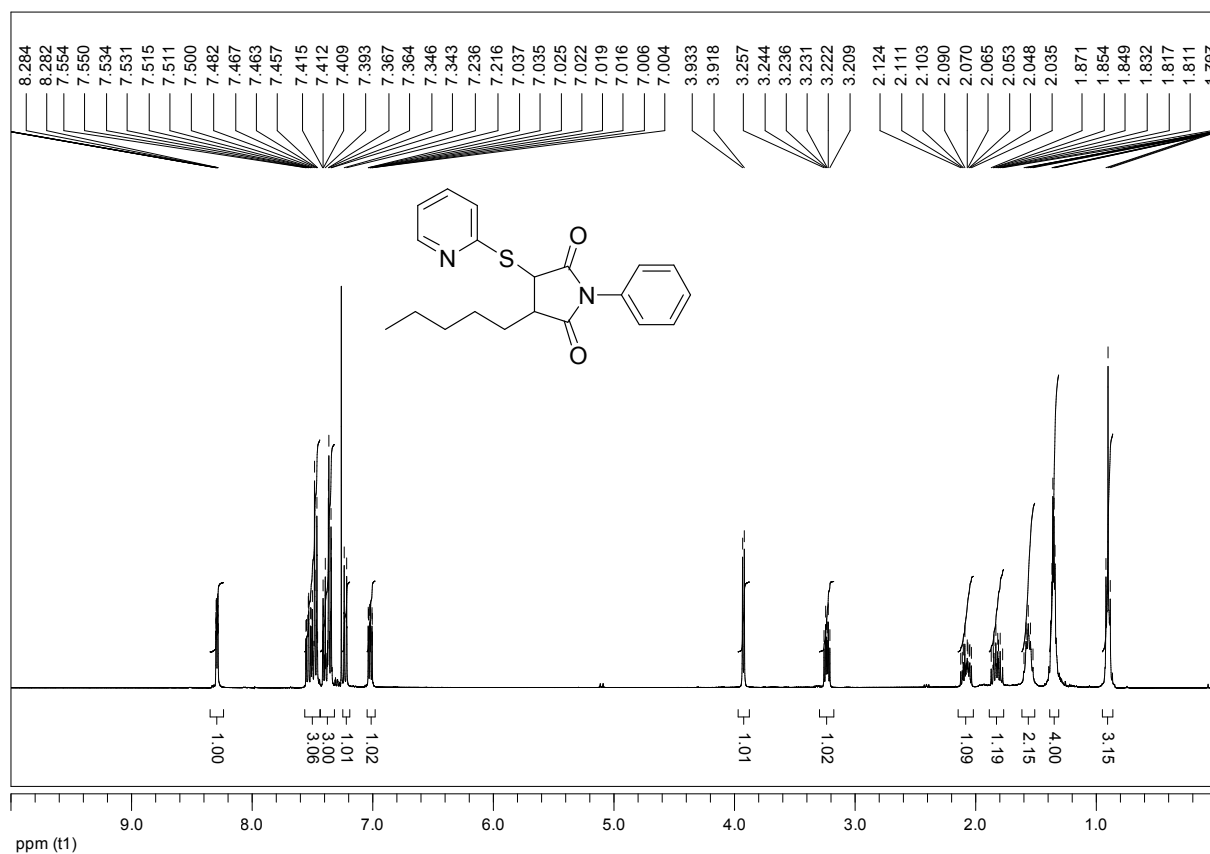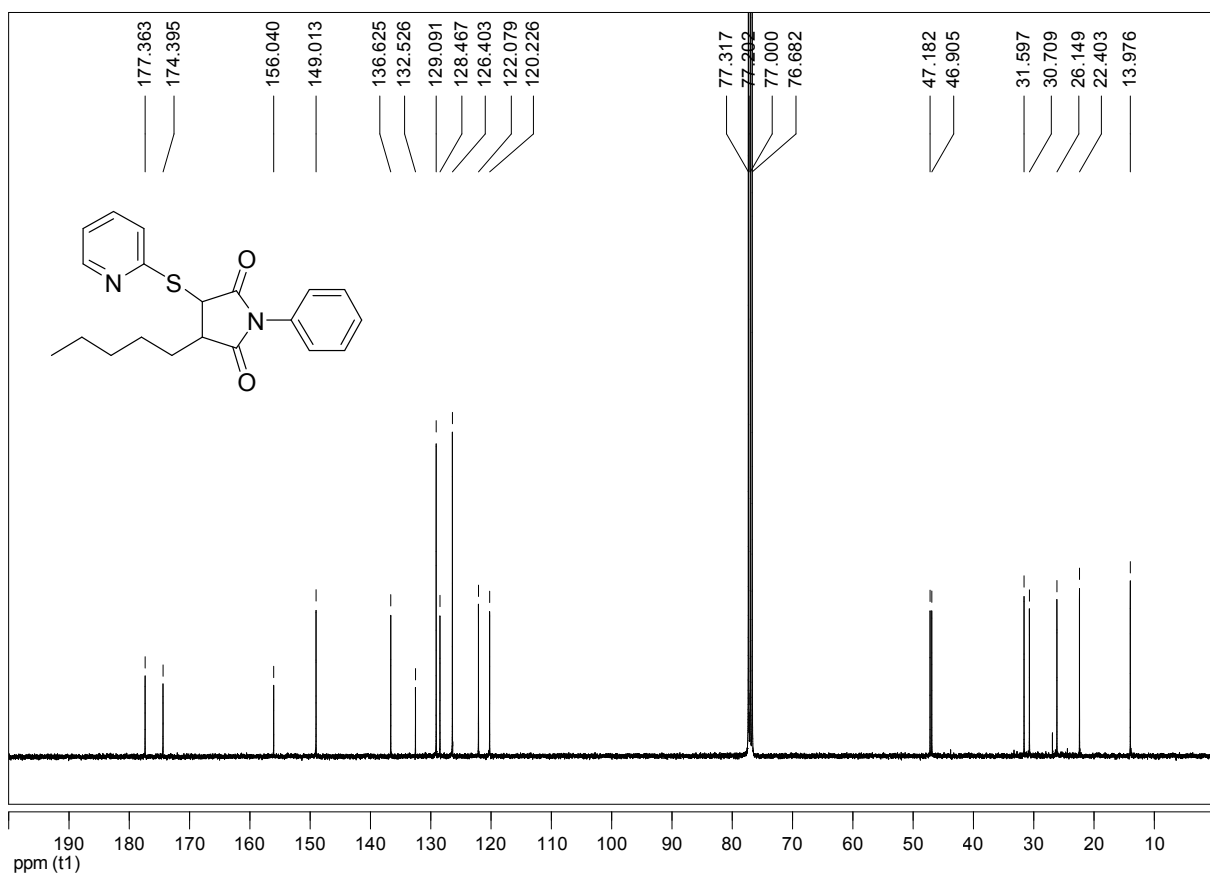

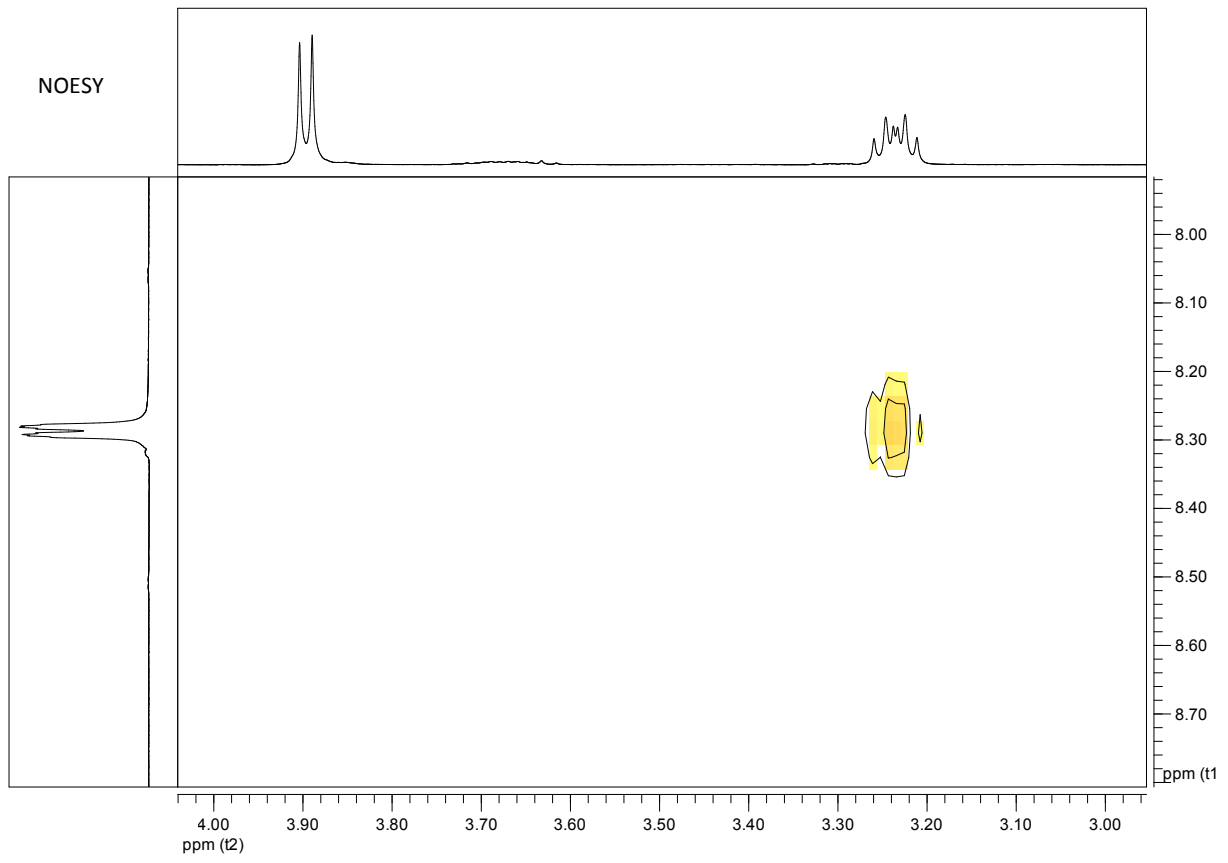



3-hexyl-1-phenyl-4-(pyridin-2-ylthio)pyrrolidine-2,5-dione (2)

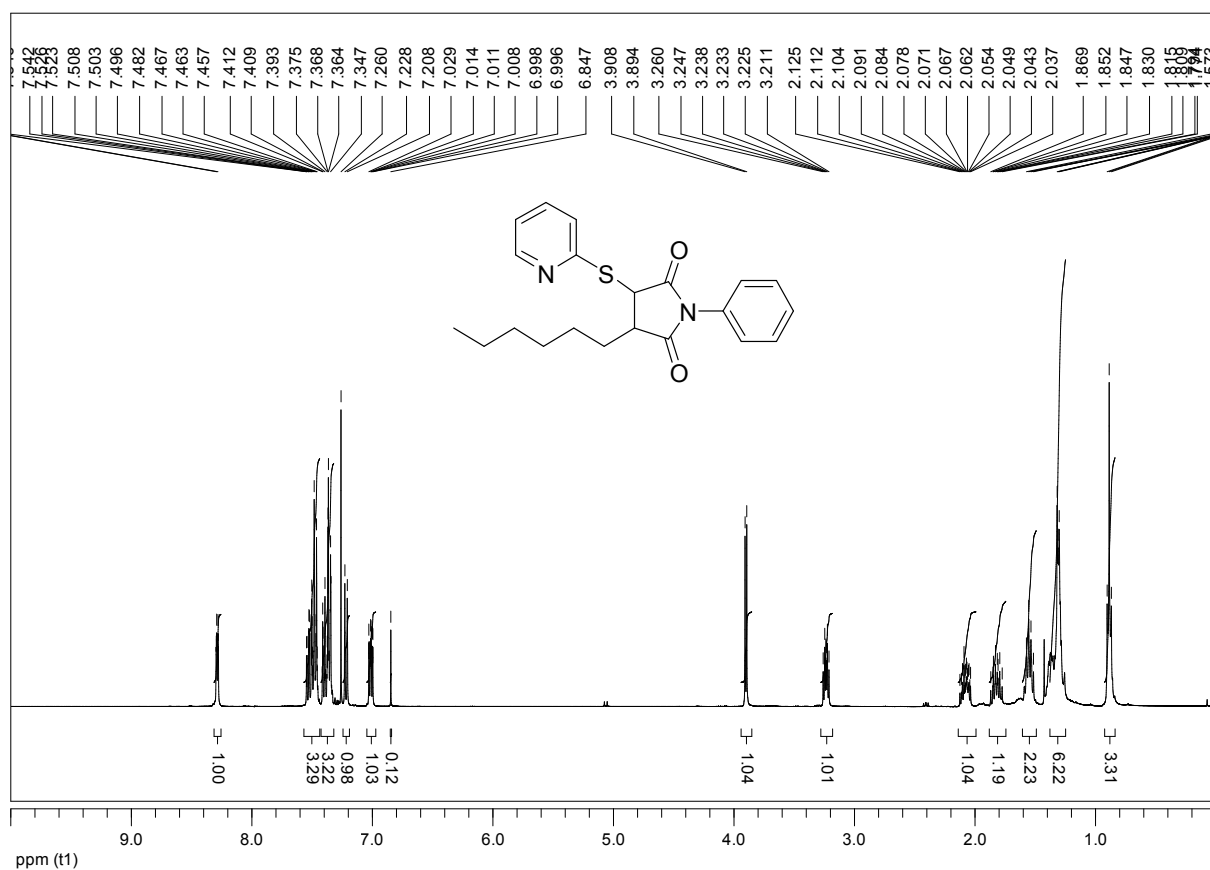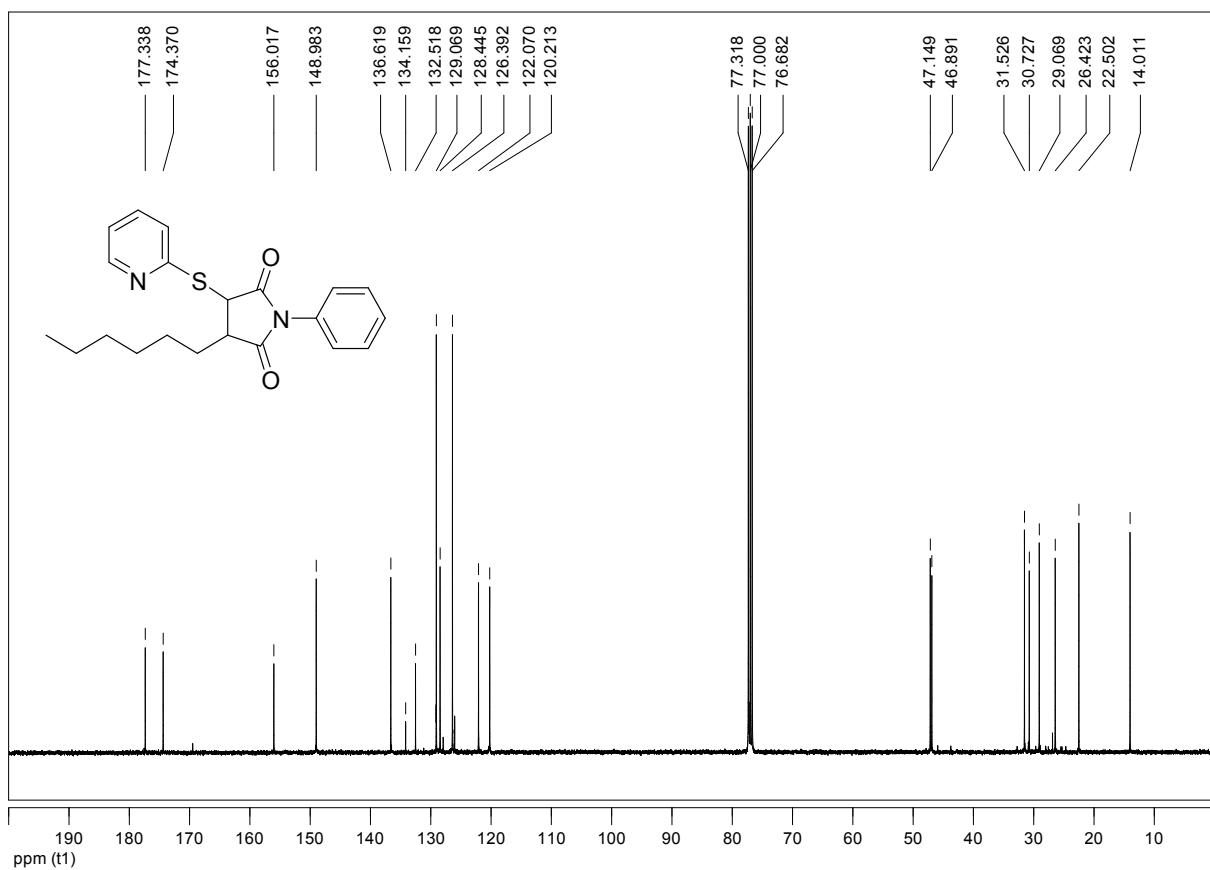

3-heptyl-1-phenyl-4-(pyridin-2-ylthio)pyrrolidine-2,5-dione (3)

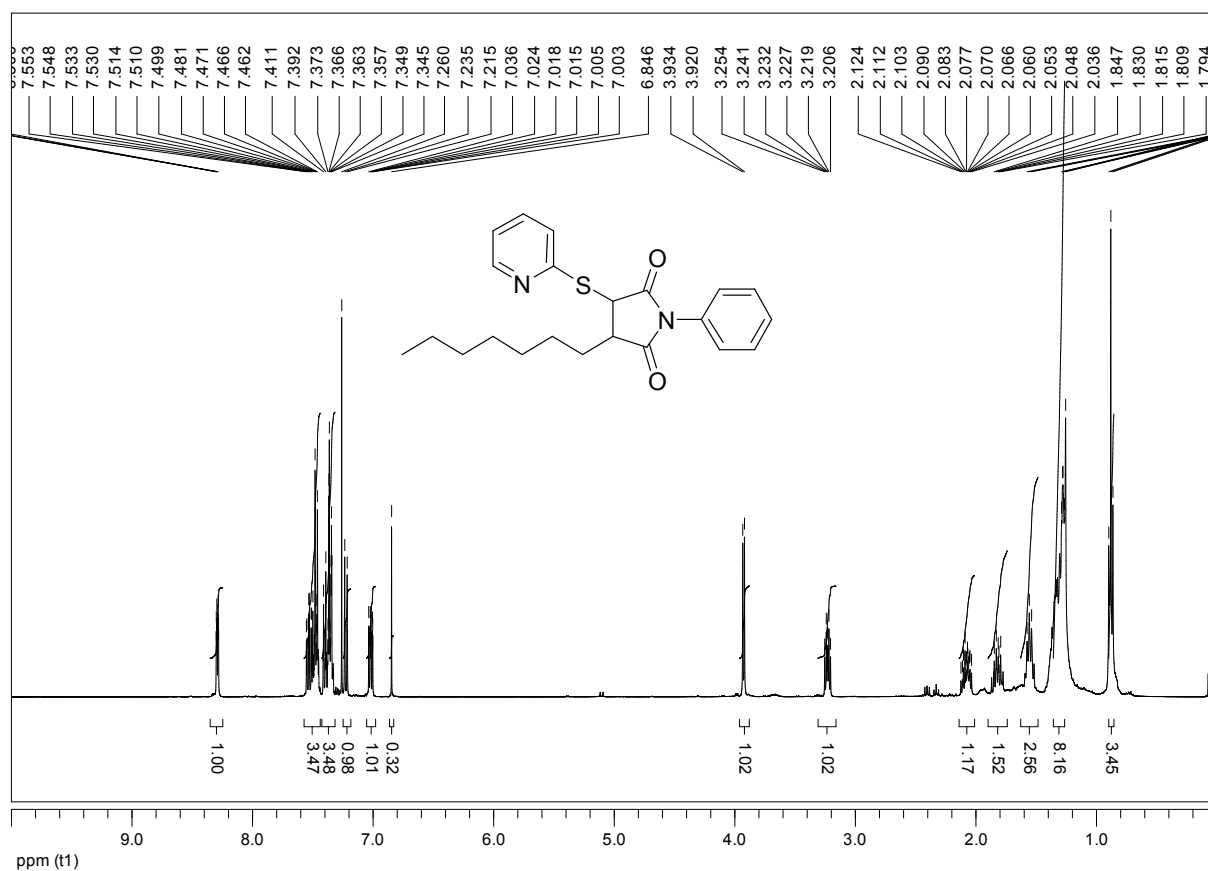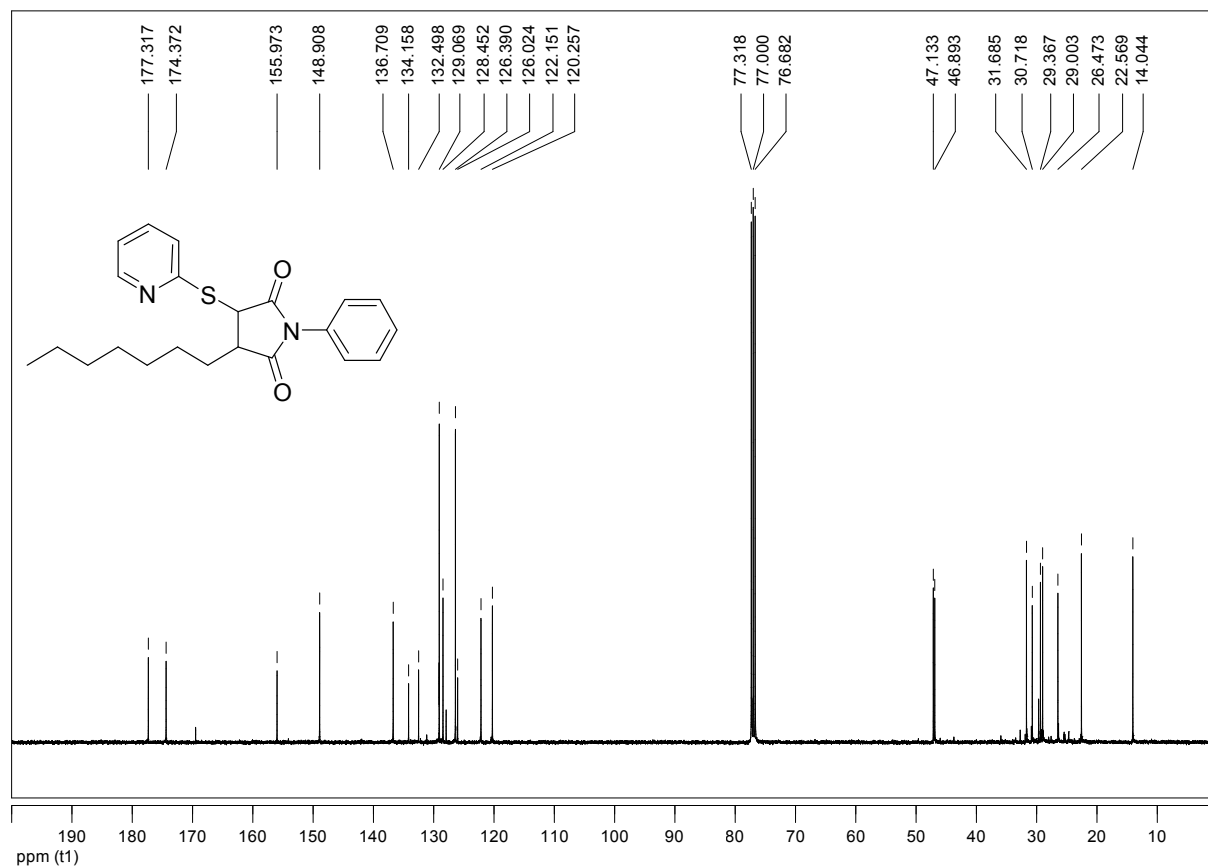



3-nonyl-1-phenyl-4-(pyridin-2-ylthio)pyrrolidine-2,5-dione (4)

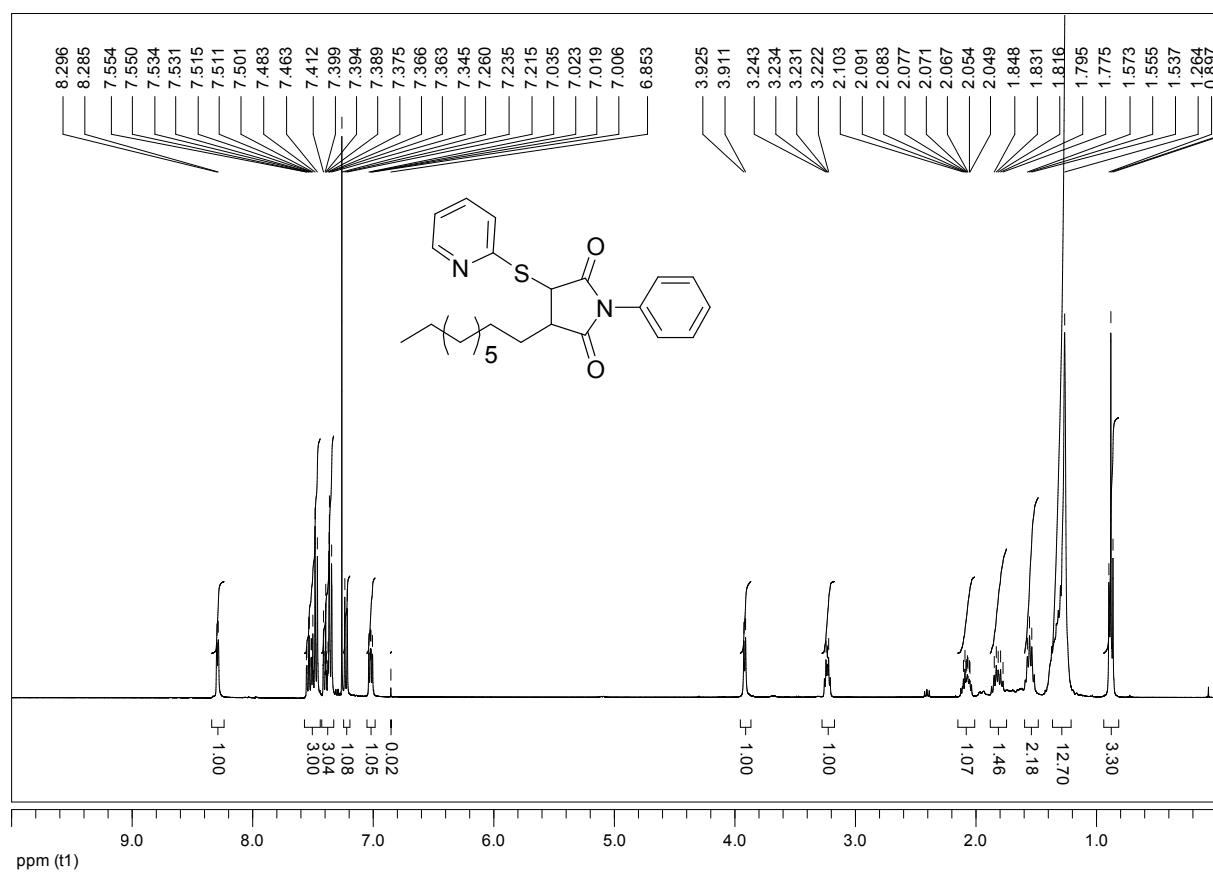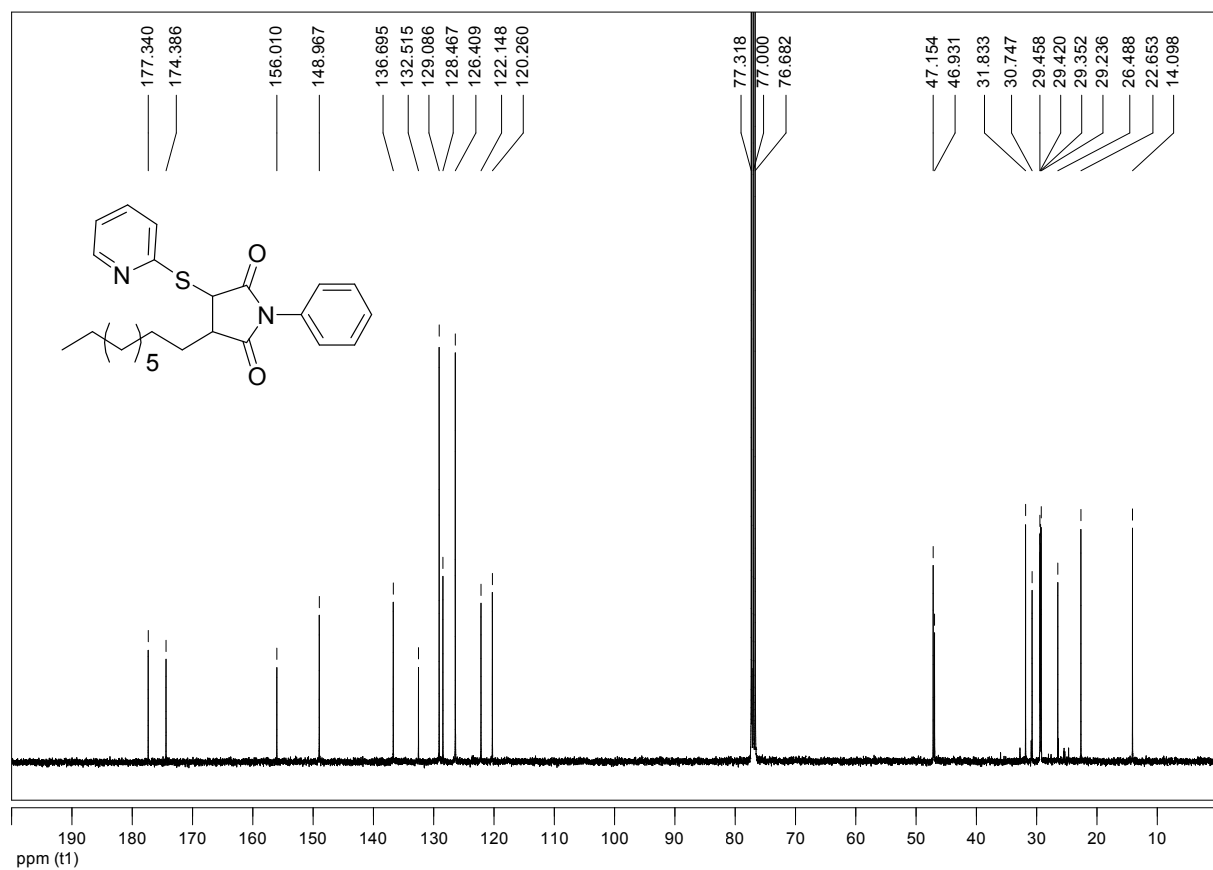

1-phenyl-3-(pyridin-2-ylthio)-4-undecylpyrrolidine-2,5-dione (5)

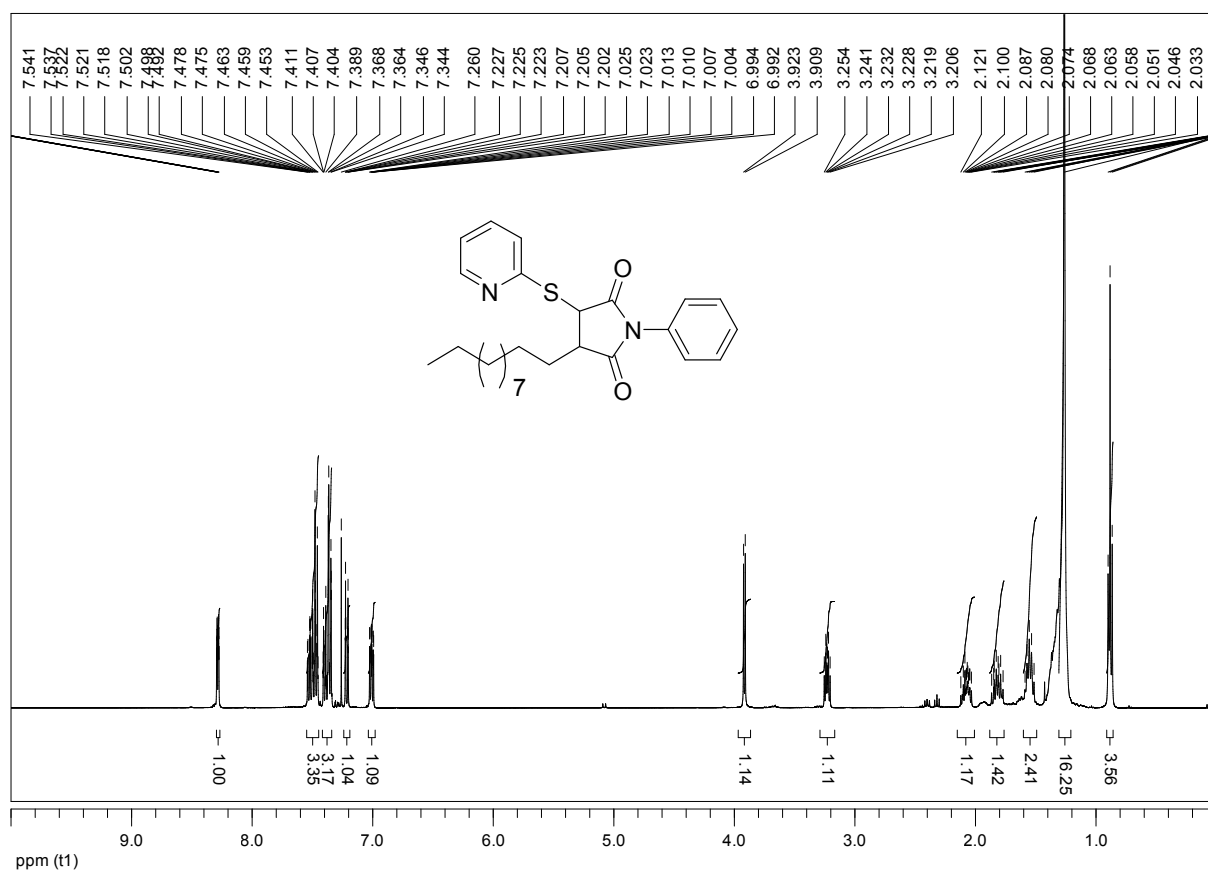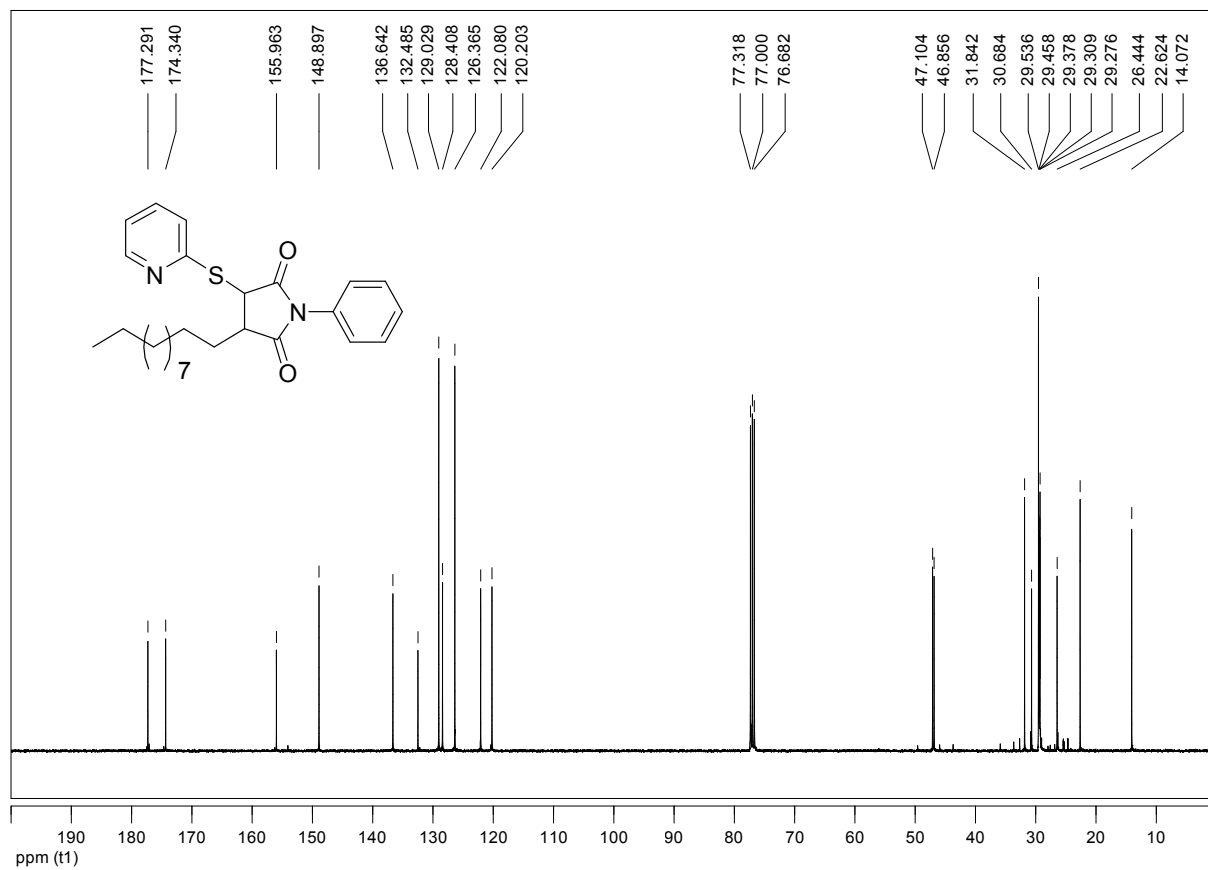

1-phenyl-3-(pyridin-2-ylthio)-4-tetradecylpyrrolidine-2,5-dione (6)

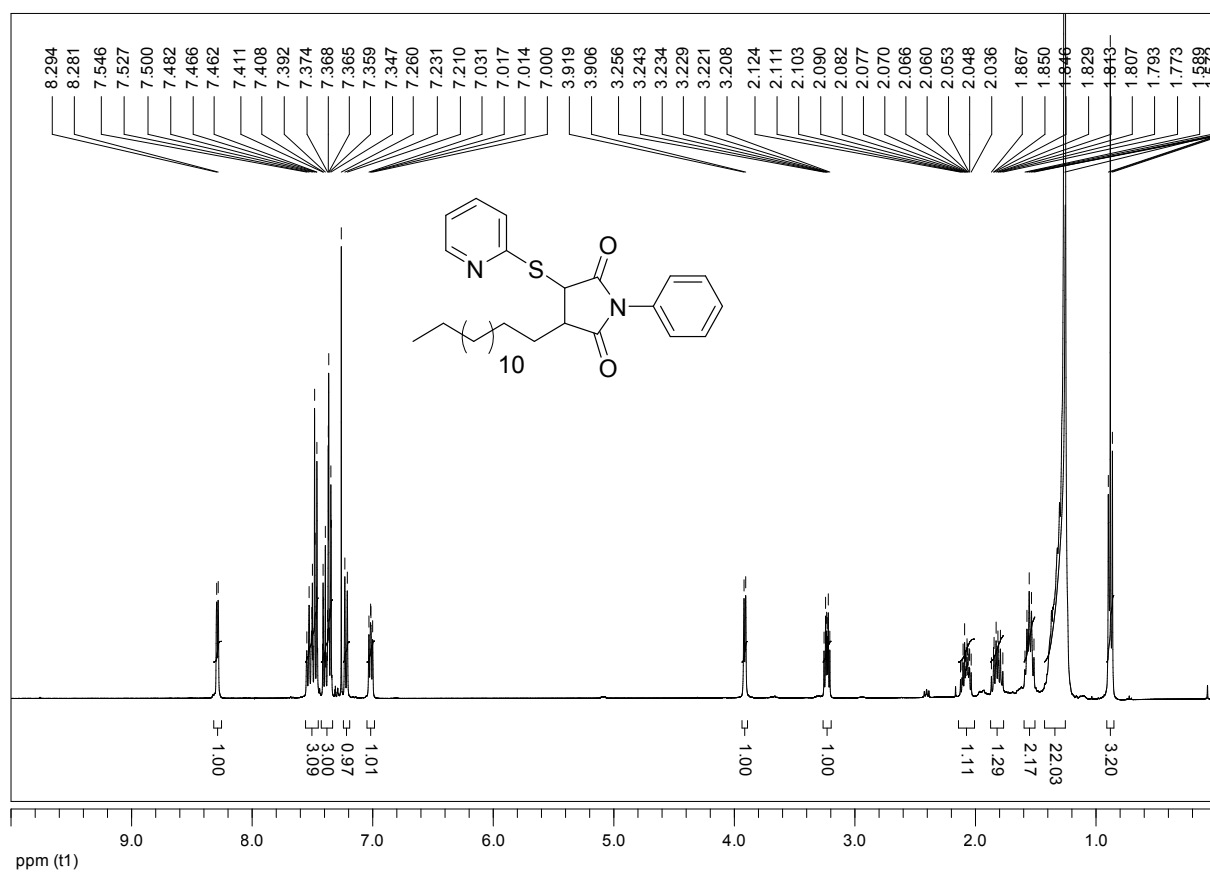

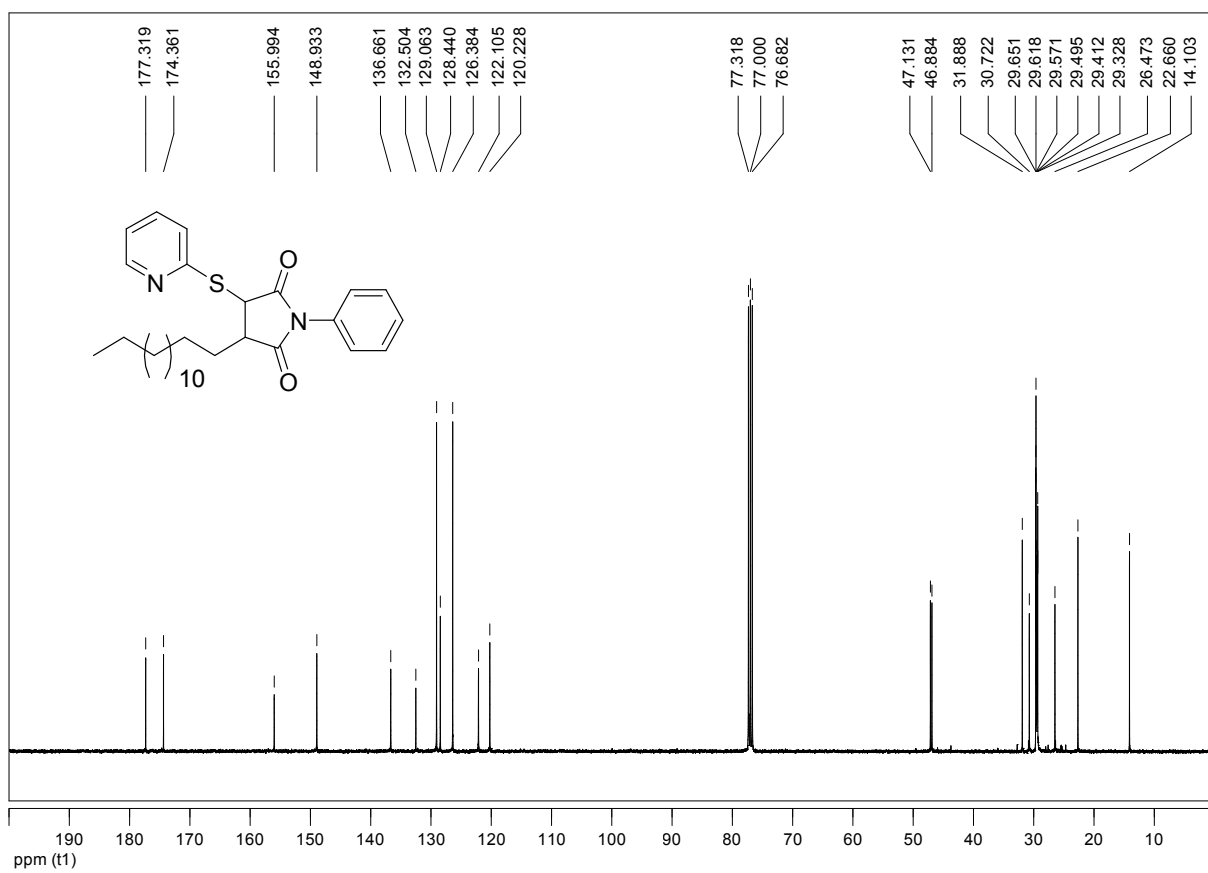

3-pentadecyl-1-phenyl-4-(pyridin-2-ylthio)pyrrolidine-2,5-dione (7)

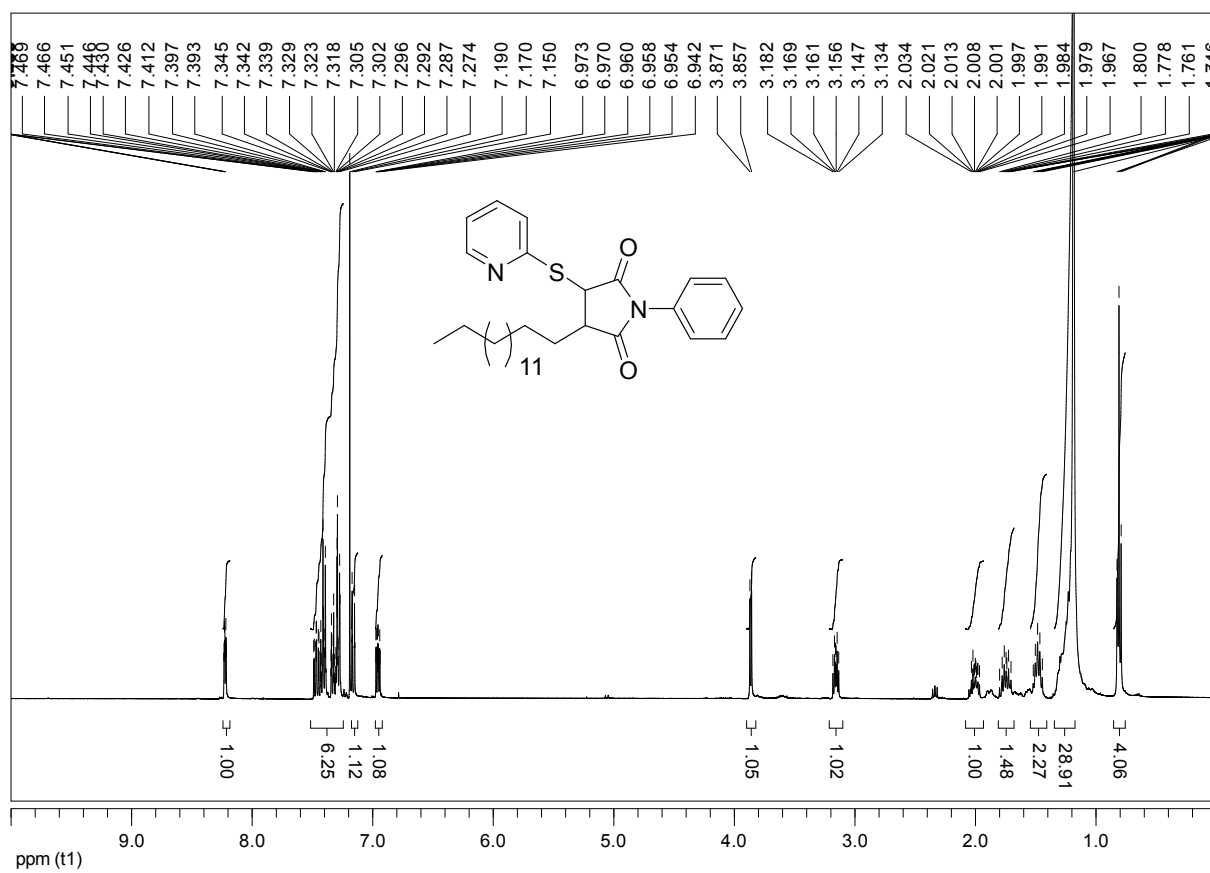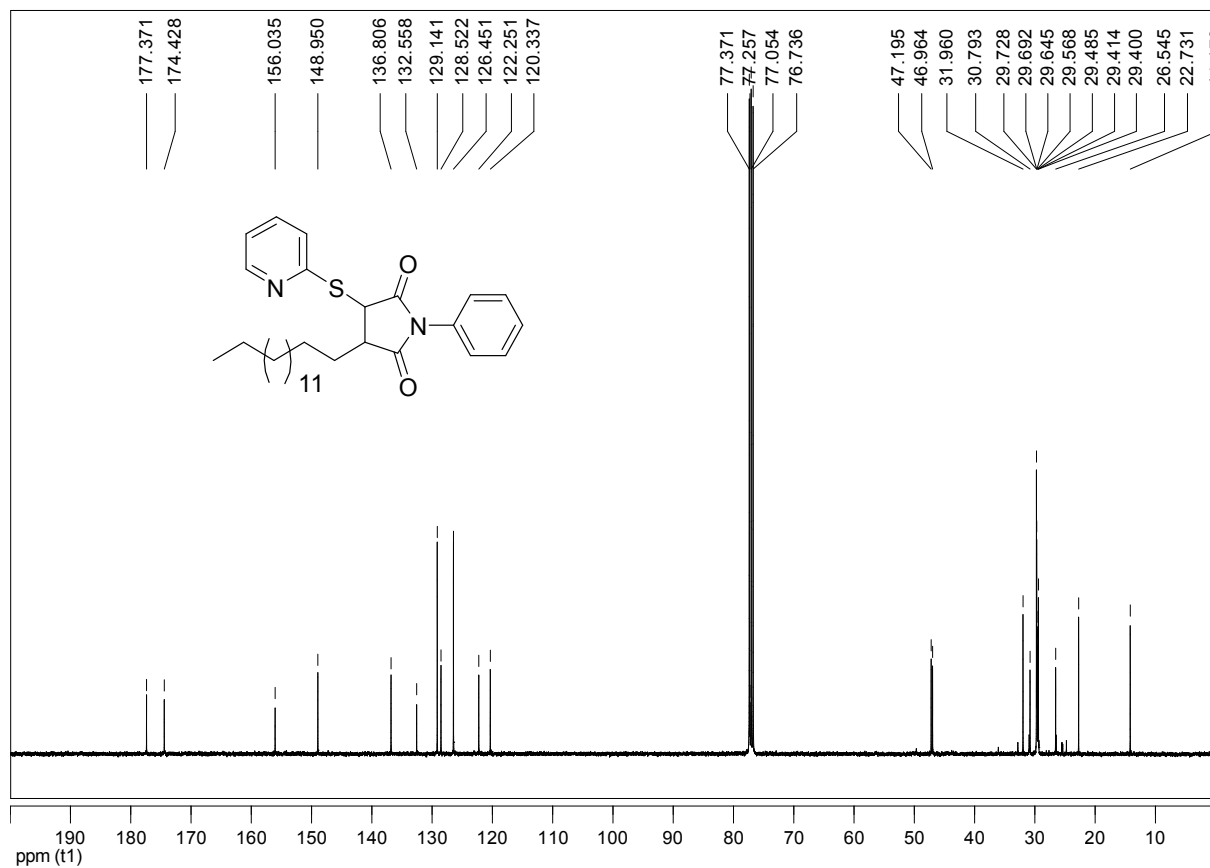



3-heptadecyl-1-phenyl-4-(pyridin-2-ylthio)pyrrolidine-2,5-dione (8)

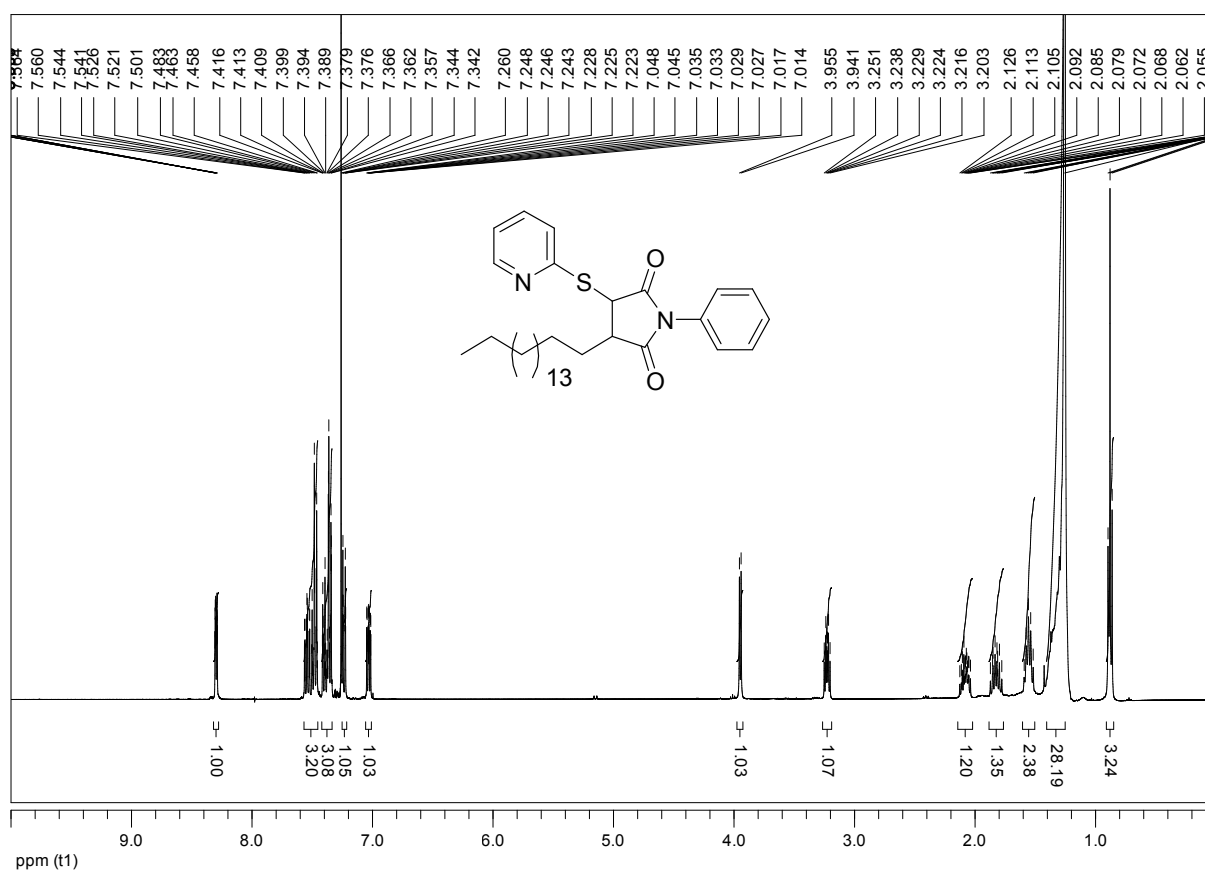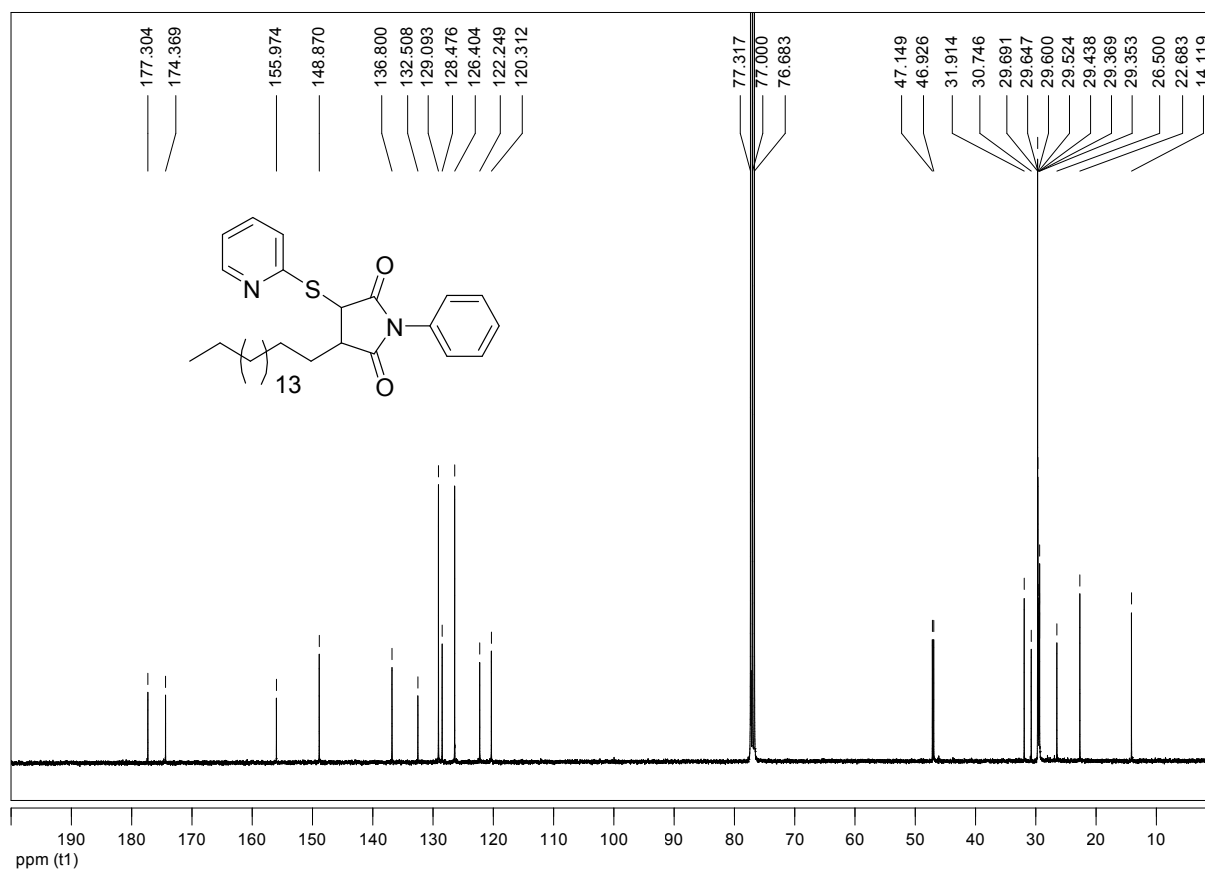

**(Z)-3-(heptadec-8-en-1-yl)-1-phenyl-4-(pyridin-2-ylthio)pyrrolidine-2,5-dione (9)**

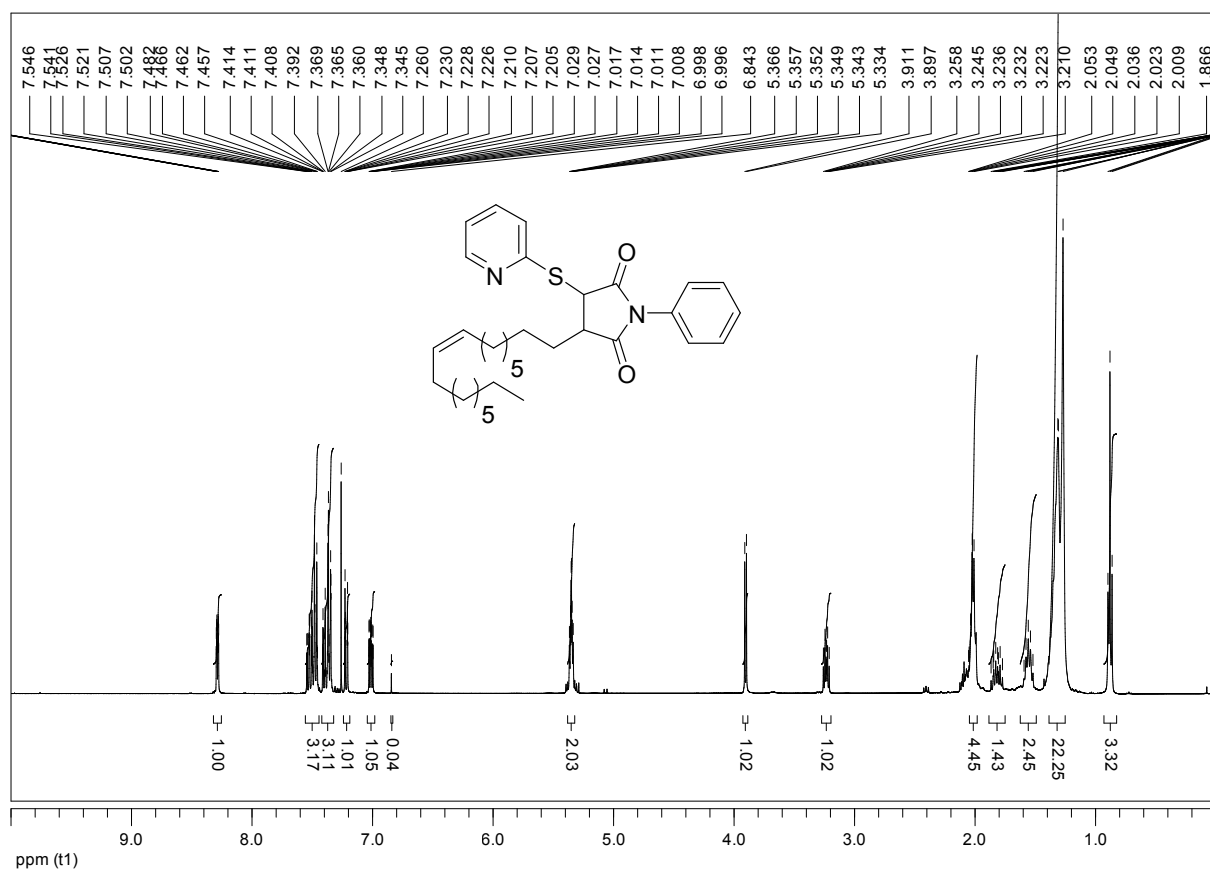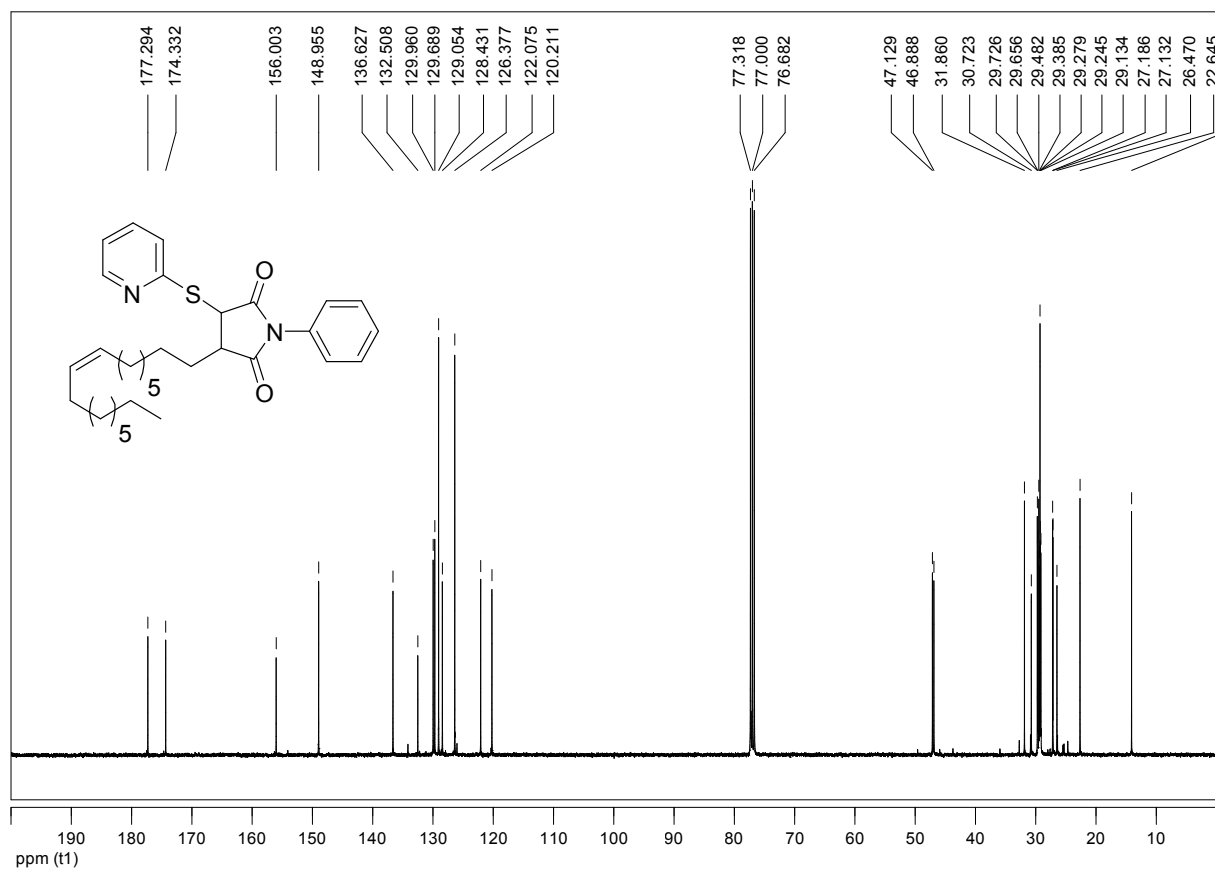

3-((8Z,11Z)-heptadeca-8,11-dien-1-yl)-1-phenyl-4-(pyridin-2-ylthio)pyrrolidine-2,5-dione (10)

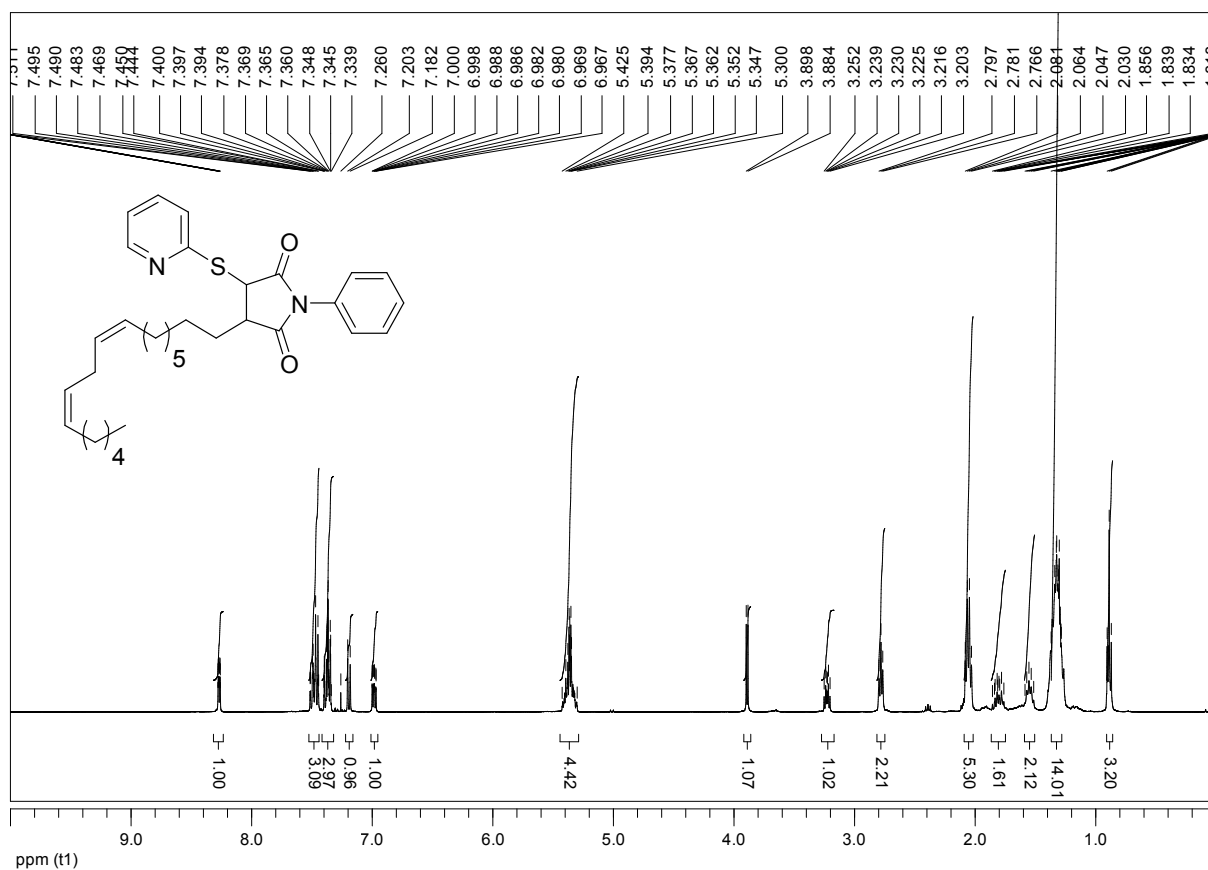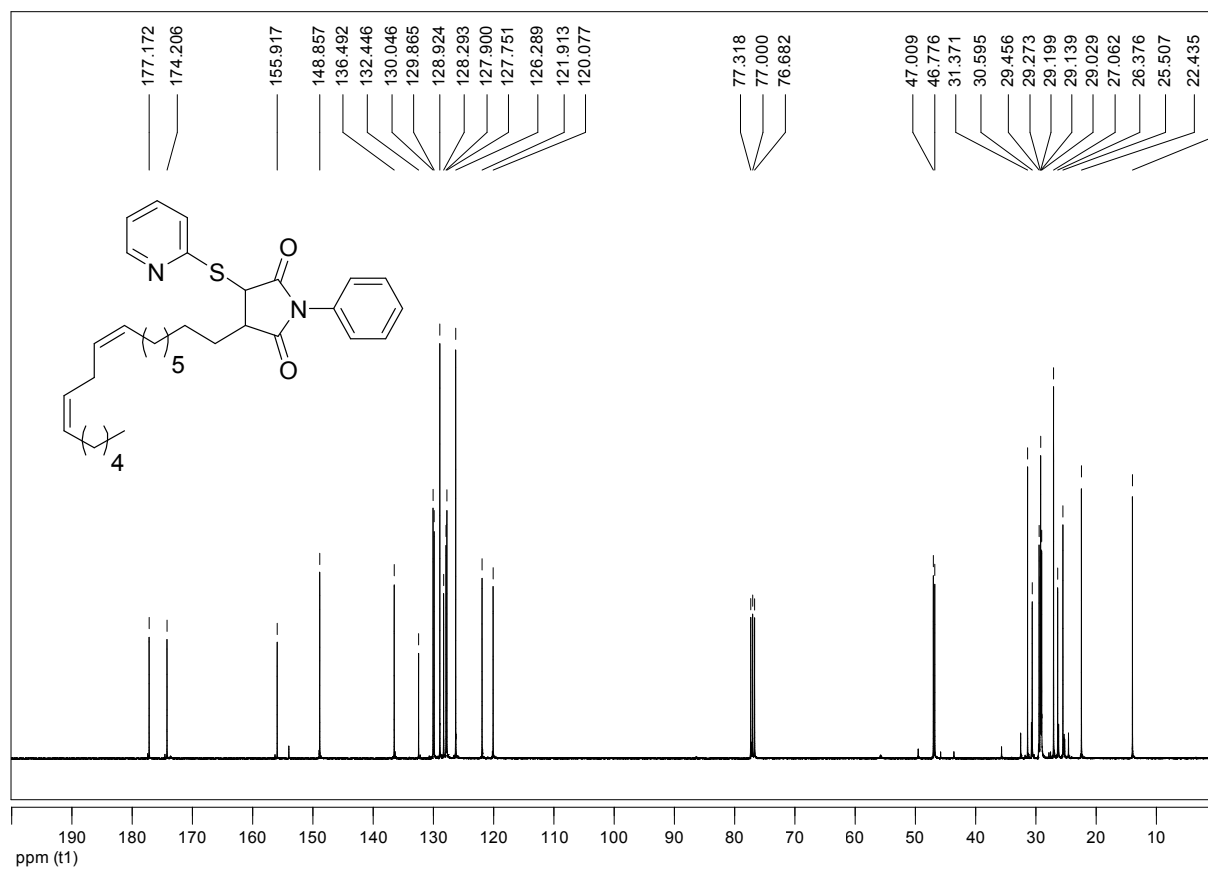

3-pentyl-1-phenyl-1H-pyrrole-2,5-dione (11)

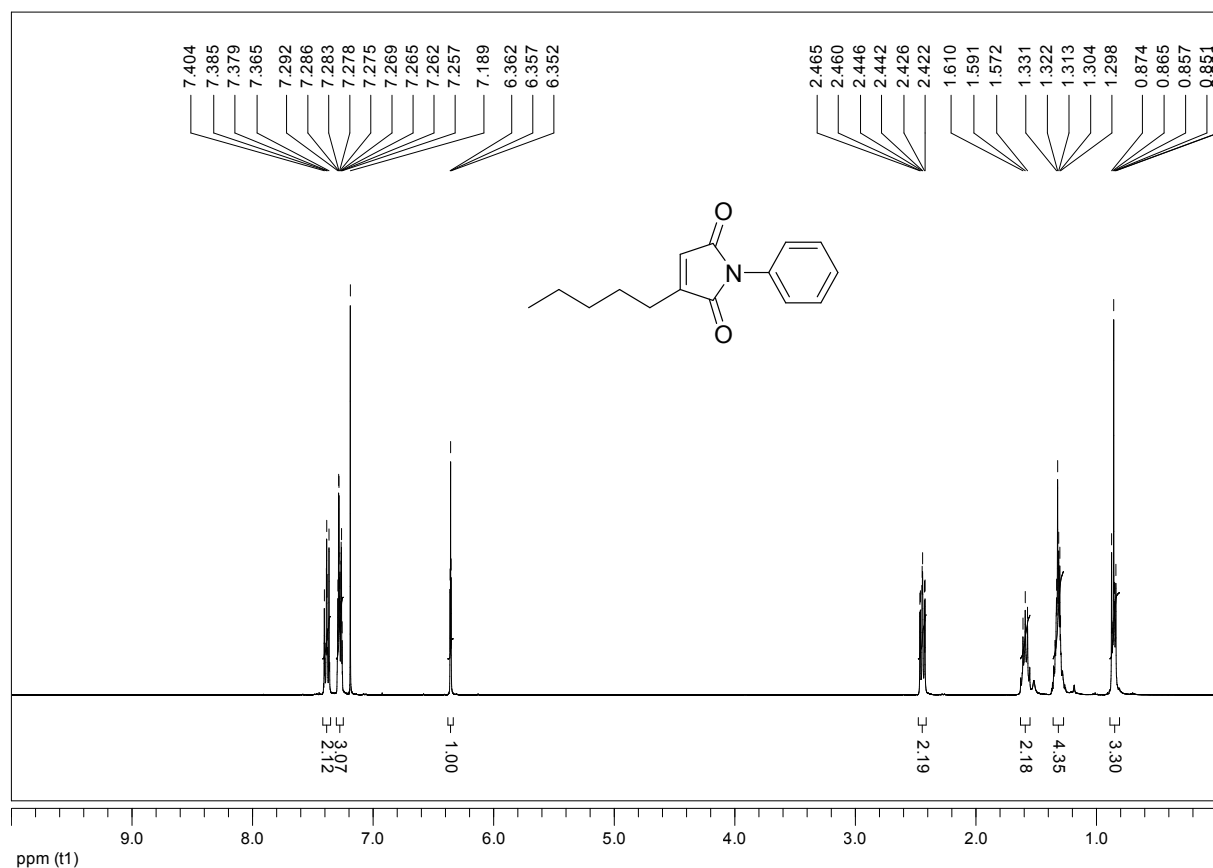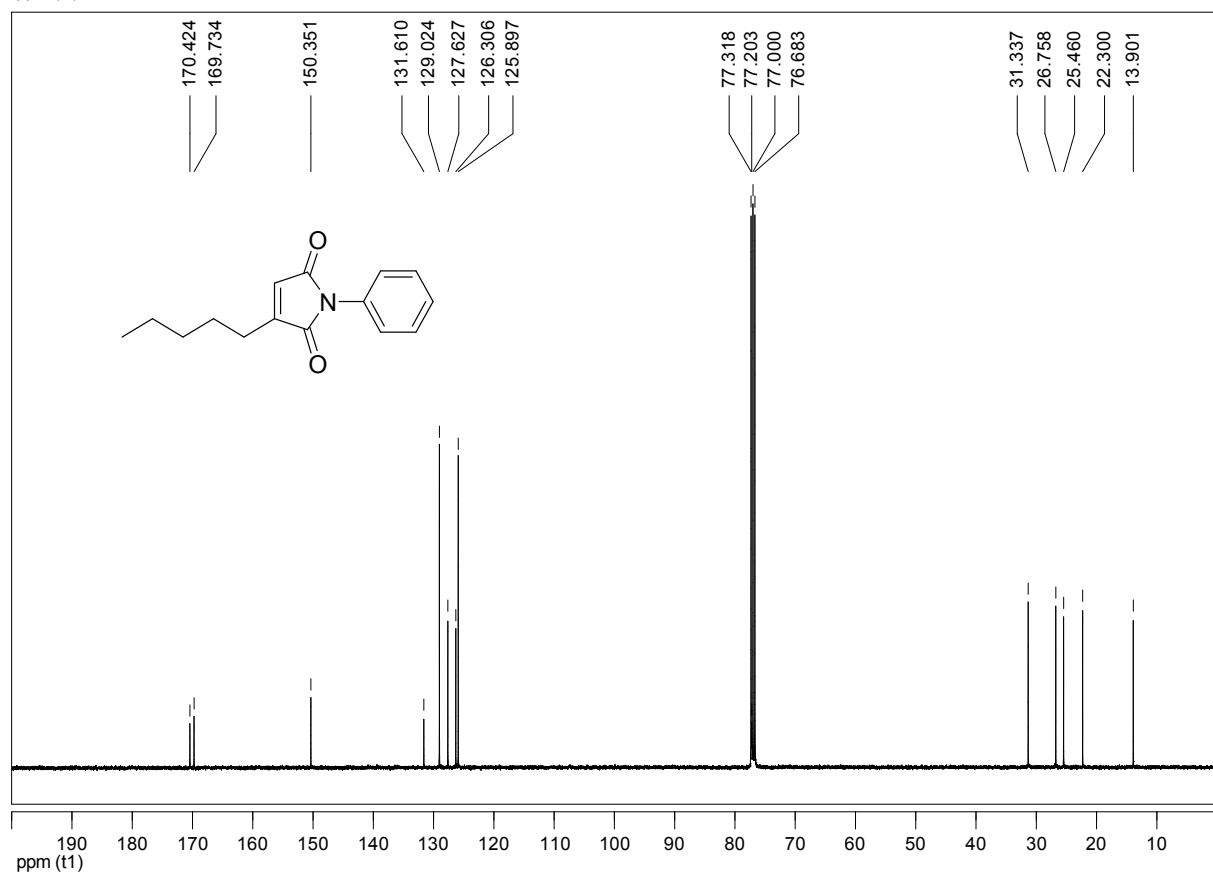

3,4-dipentyl-1-phenyl-3-(pyridin-2-ylthio)pyrrolidine-2,5-dione (12a and 12b)

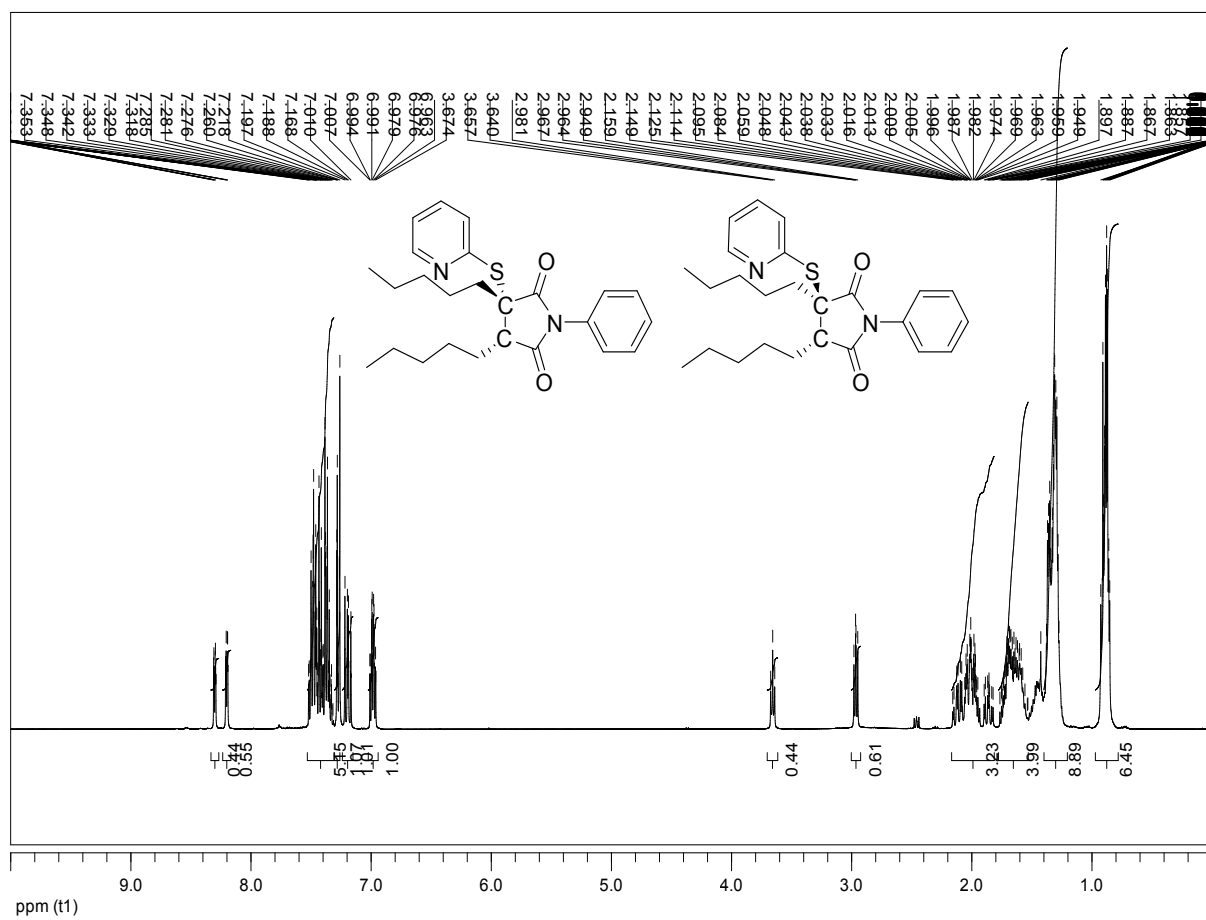



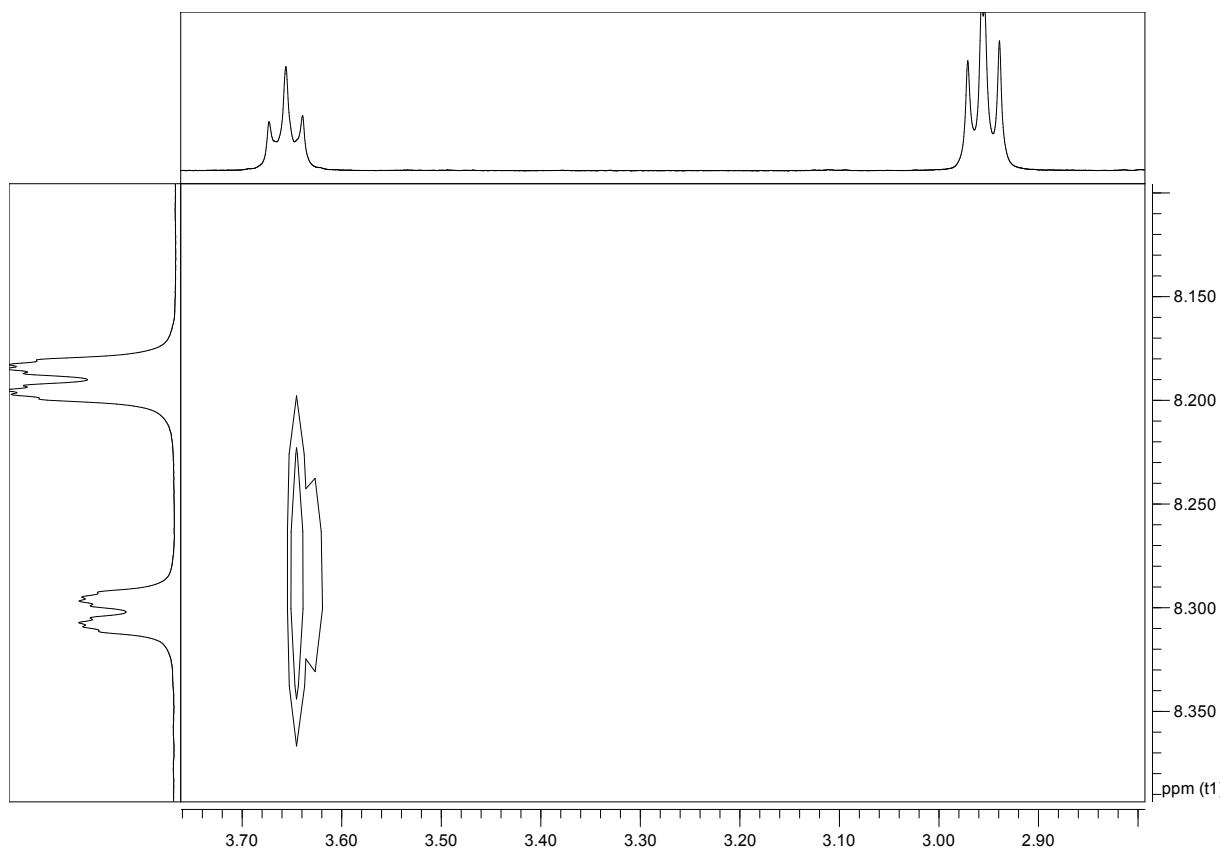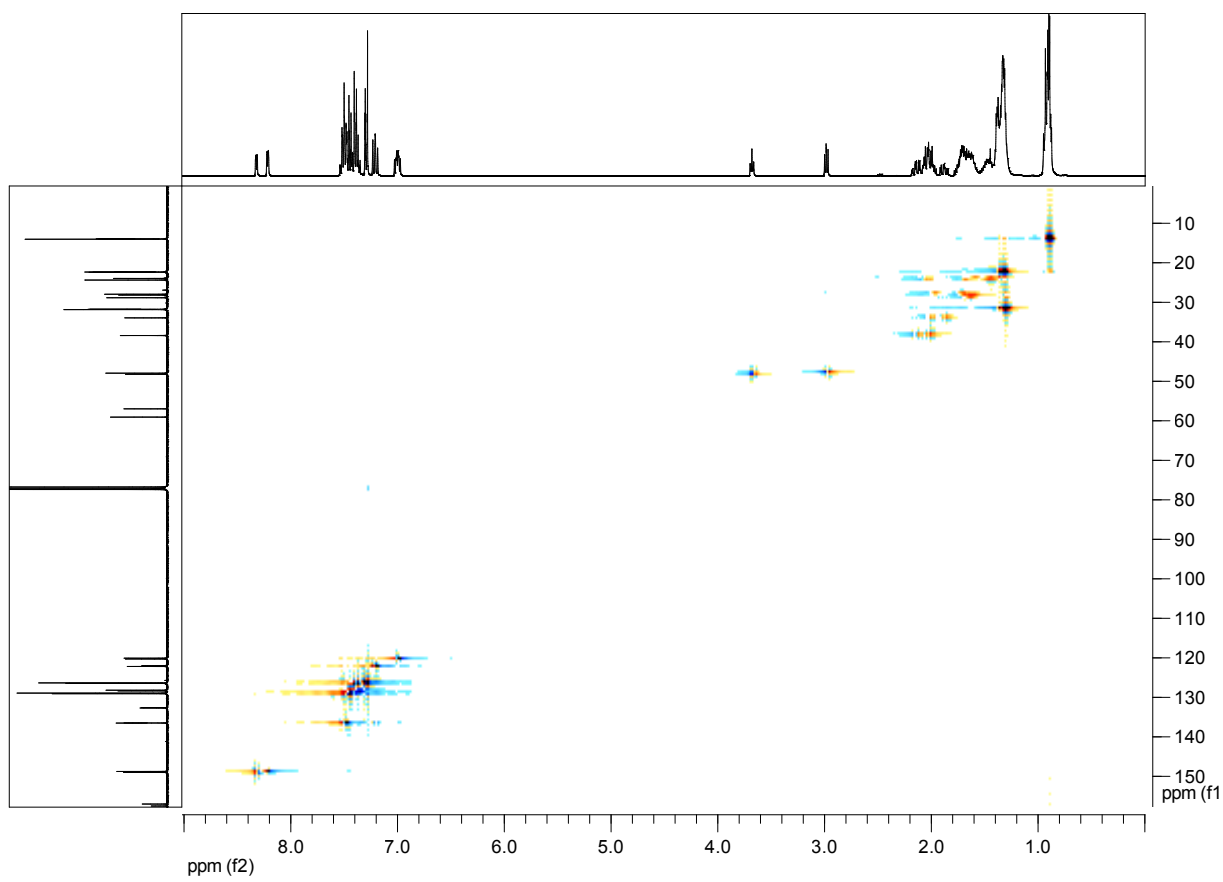

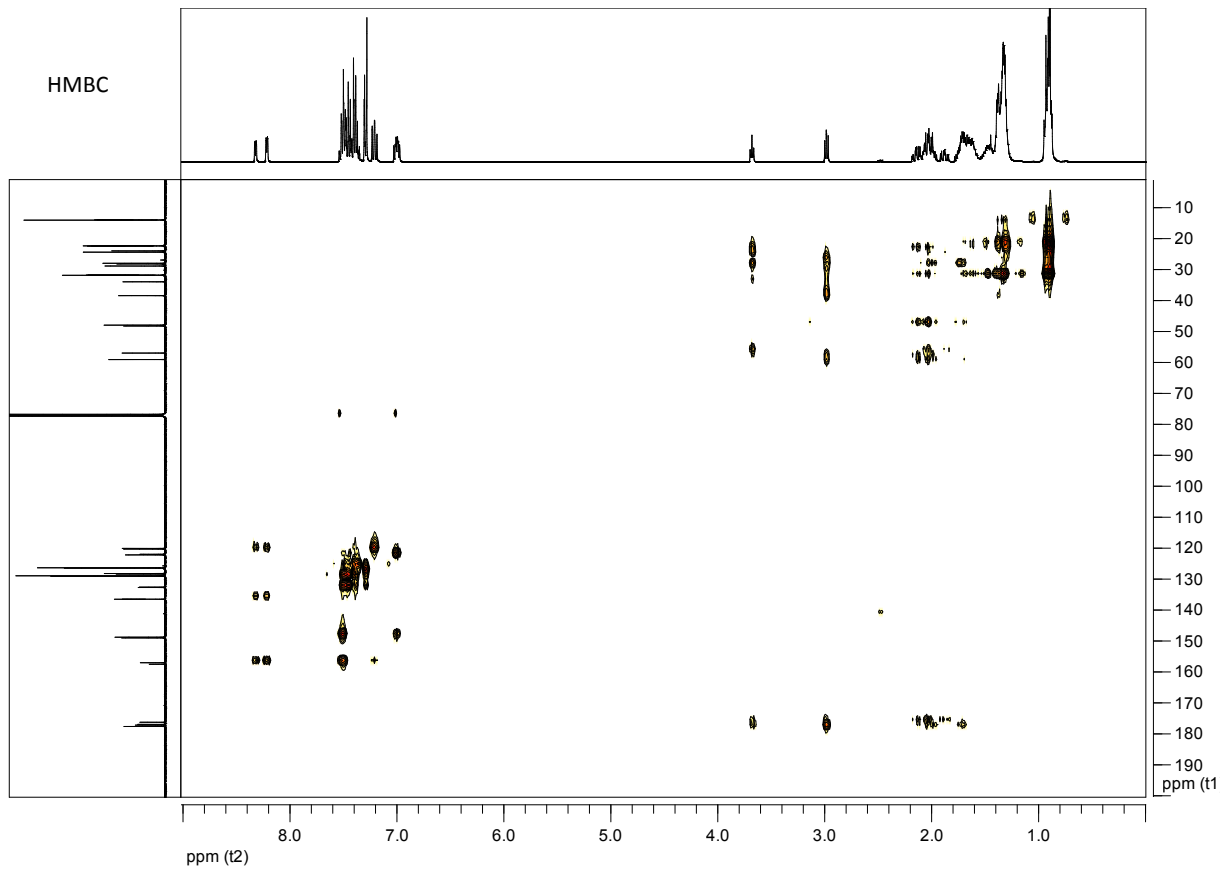



3,4-dipentyl-1-phenyl-1H-pyrrole-2,5-dione (13)

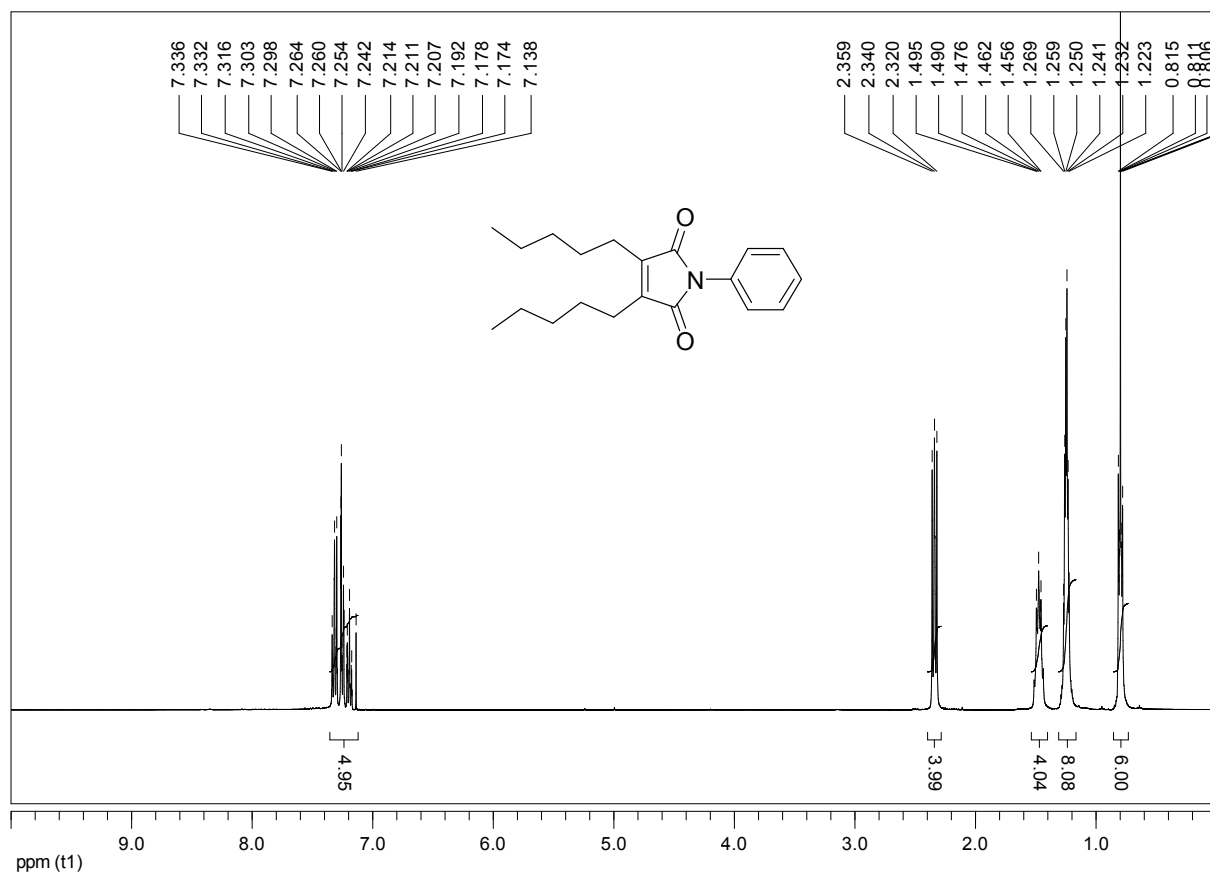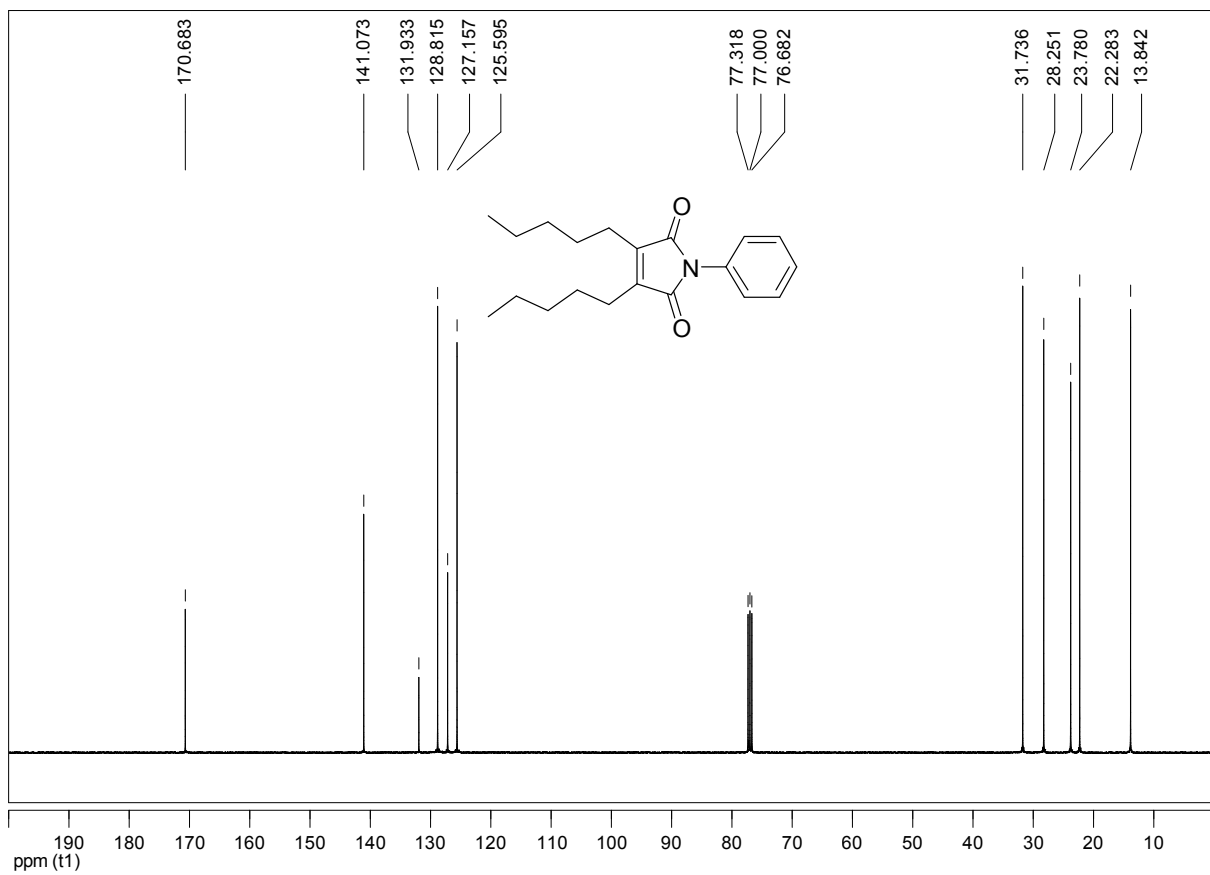

Supplement: c5ra12583a1.pdf [file c5ra12583a1.pdf]
